# Supplementary figures and images for: Tissue‐Specific Analysis of Pharmacological Pathways
Source: PubMed Central journal article supplement — CPT Pharmacometrics Syst Pharmacol. 2018 Jun 19;7(7):453–63. doi: 10.1002/psp4.12305 (PMC6063738; doi:10.1002/psp4.12305), 2018-06-19

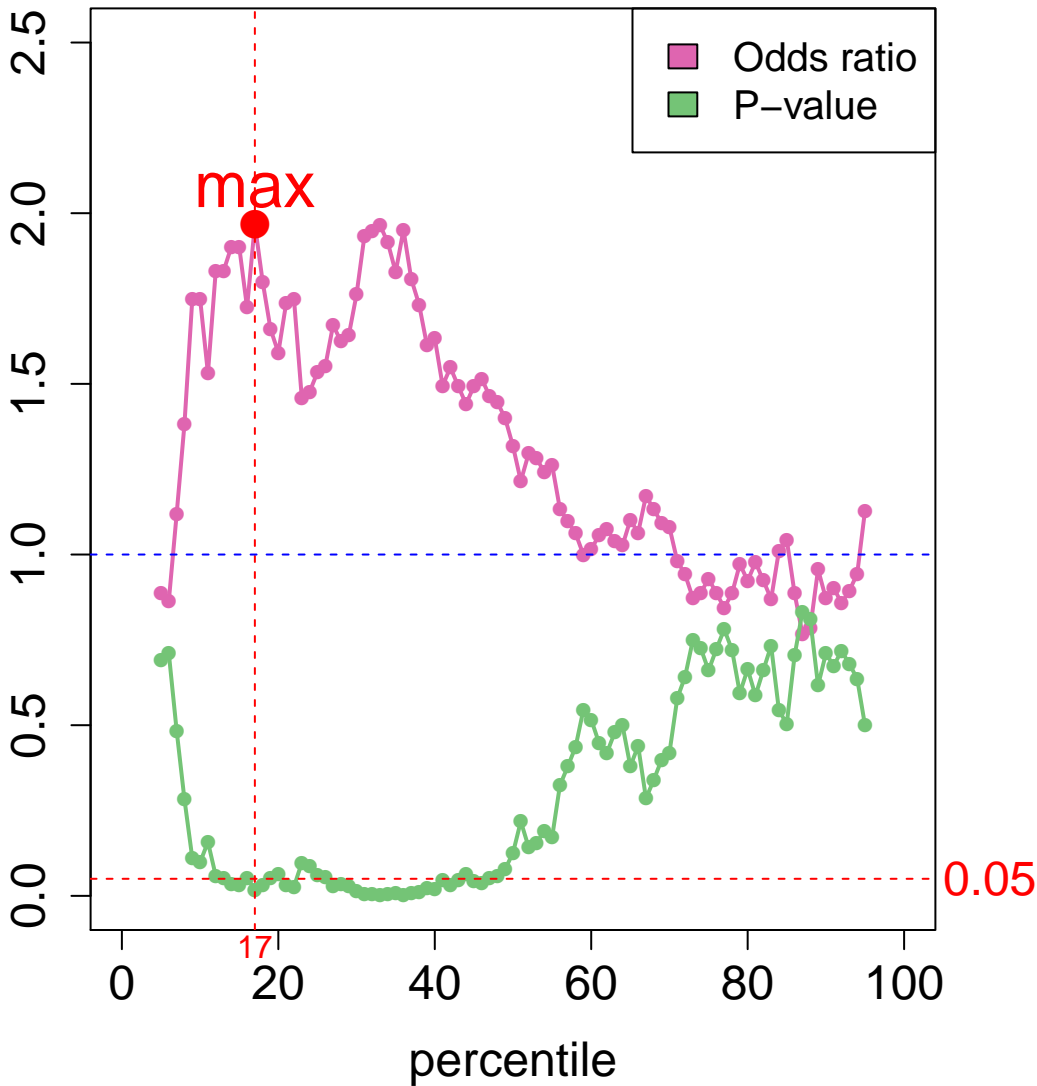

Supplement: PSP4-7-453-s002.pdf [file PSP4-7-453-s002.pdf]

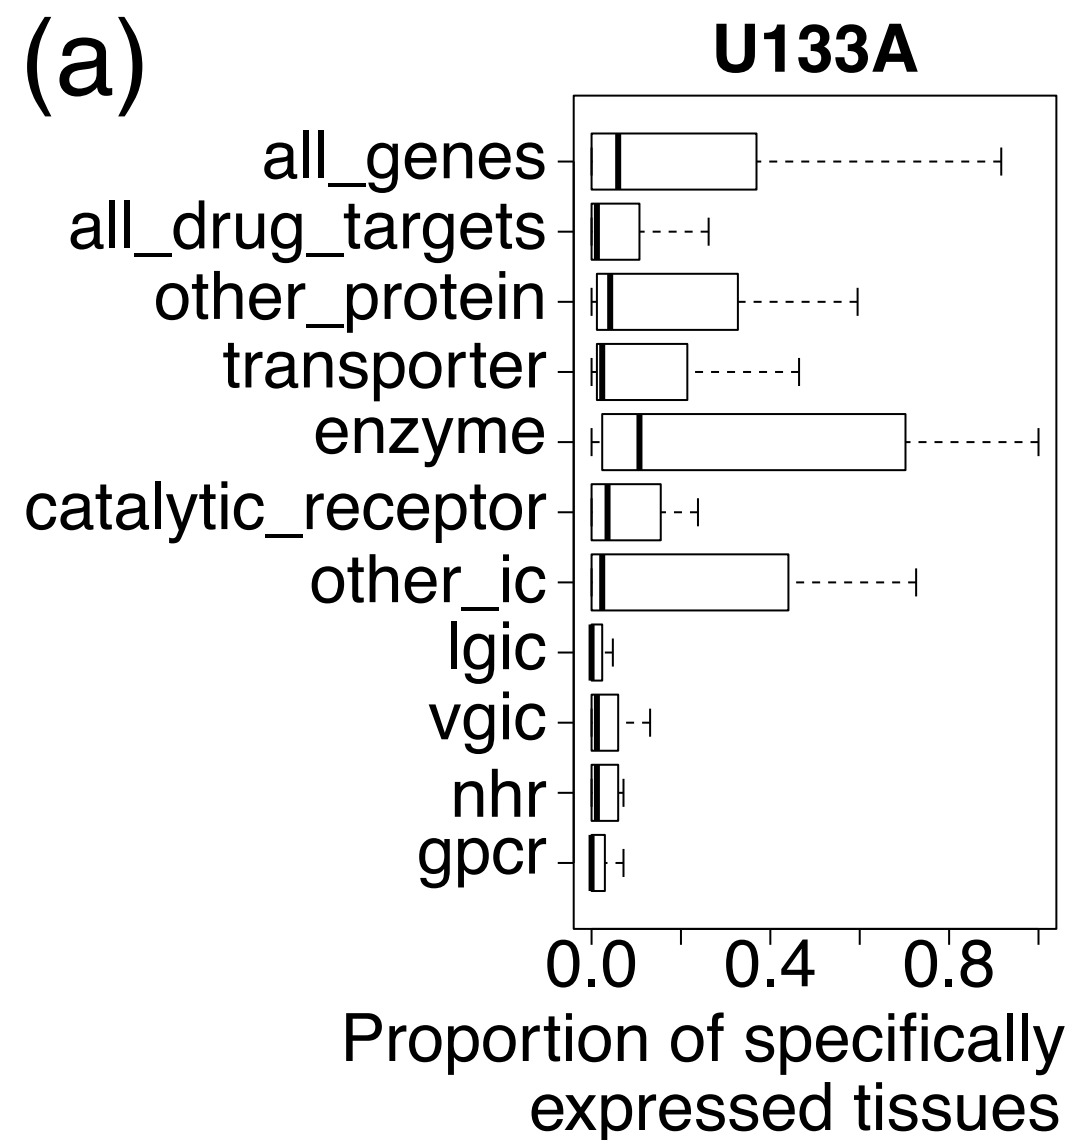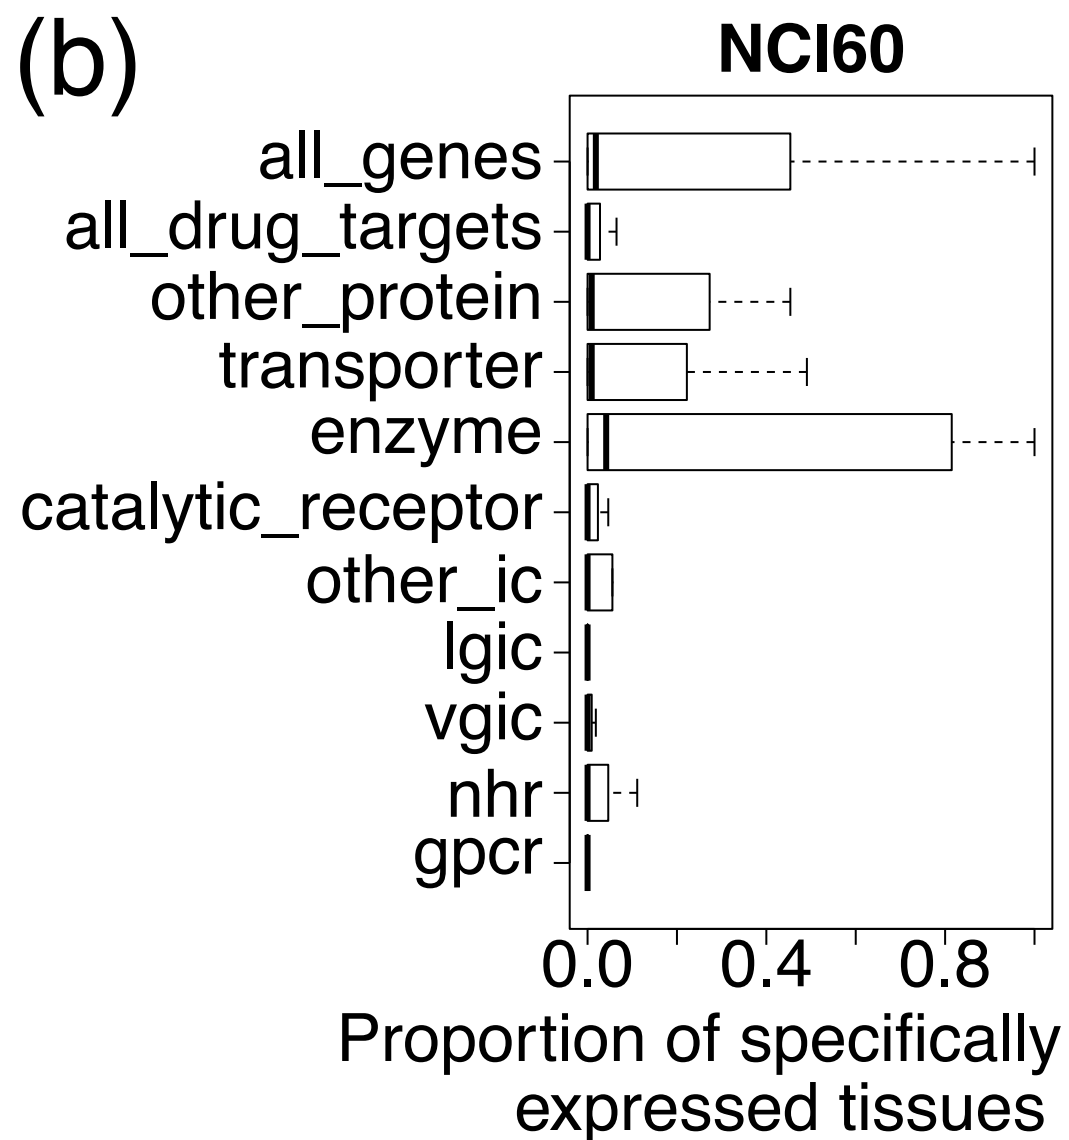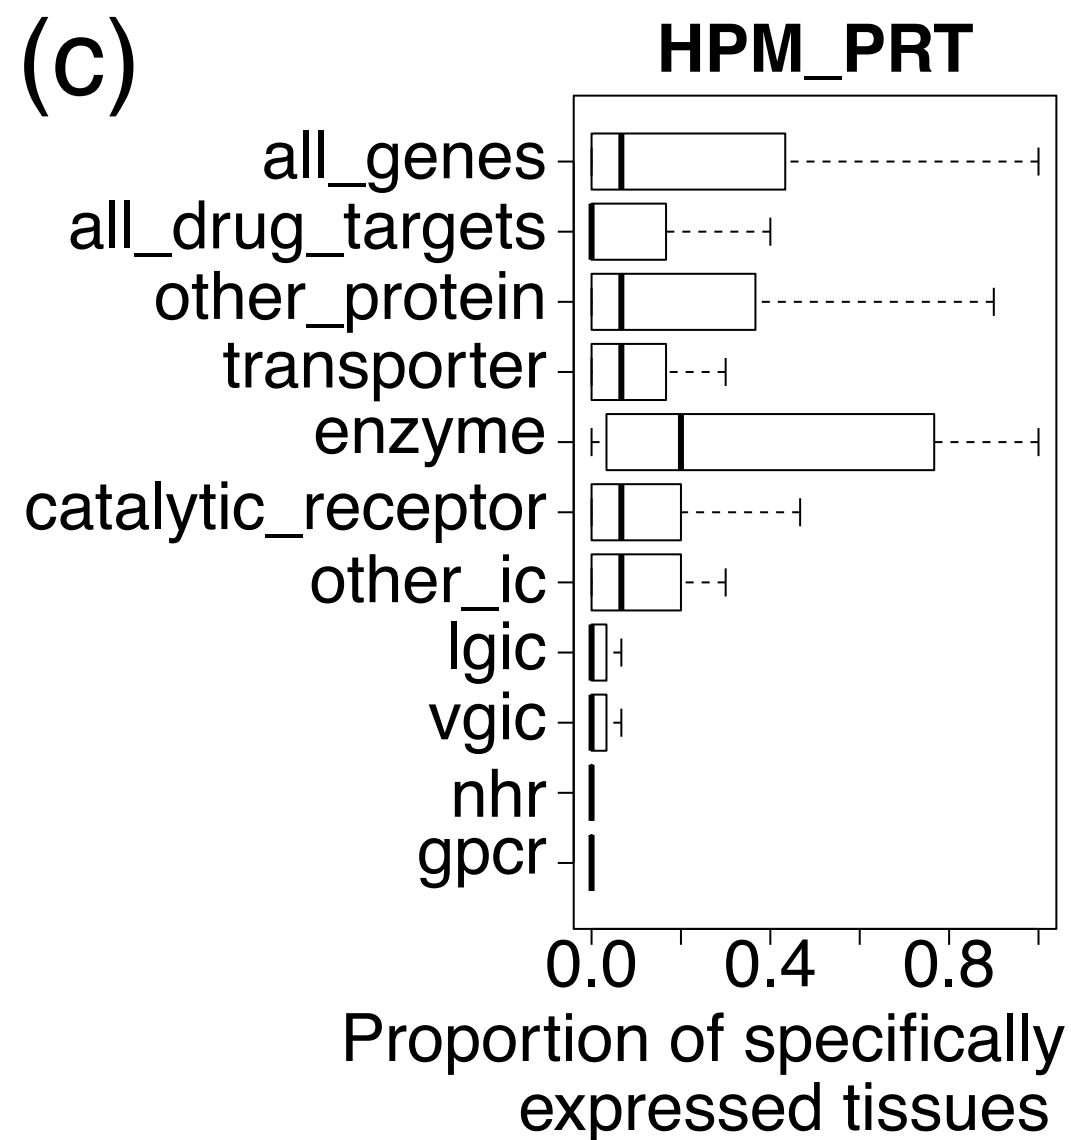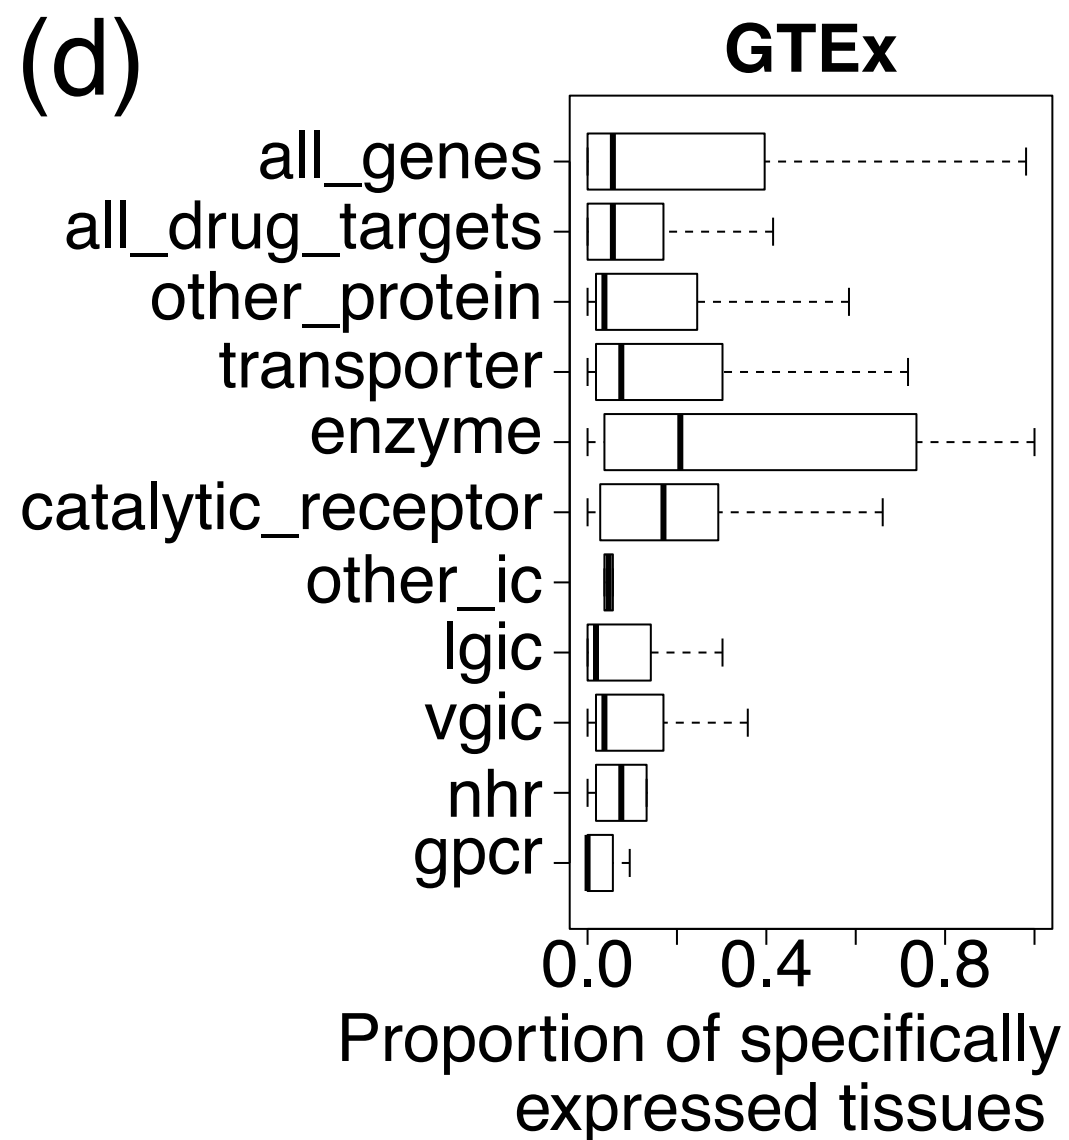

Supplement: PSP4-7-453-s003.pdf [file PSP4-7-453-s003.pdf]

Size of pathway

0 100 300 500

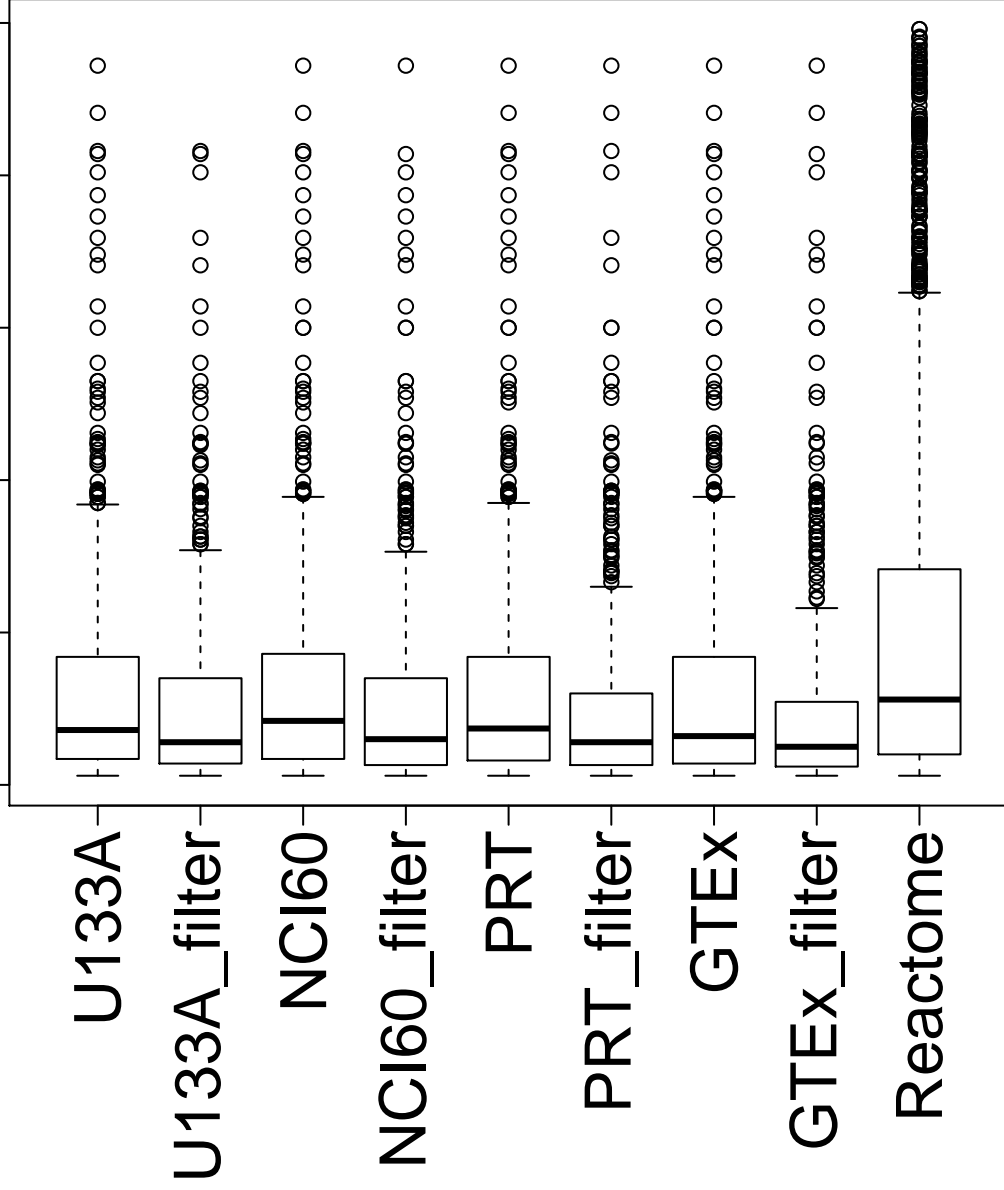

Supplement: PSP4-7-453-s004.pdf [file PSP4-7-453-s004.pdf]

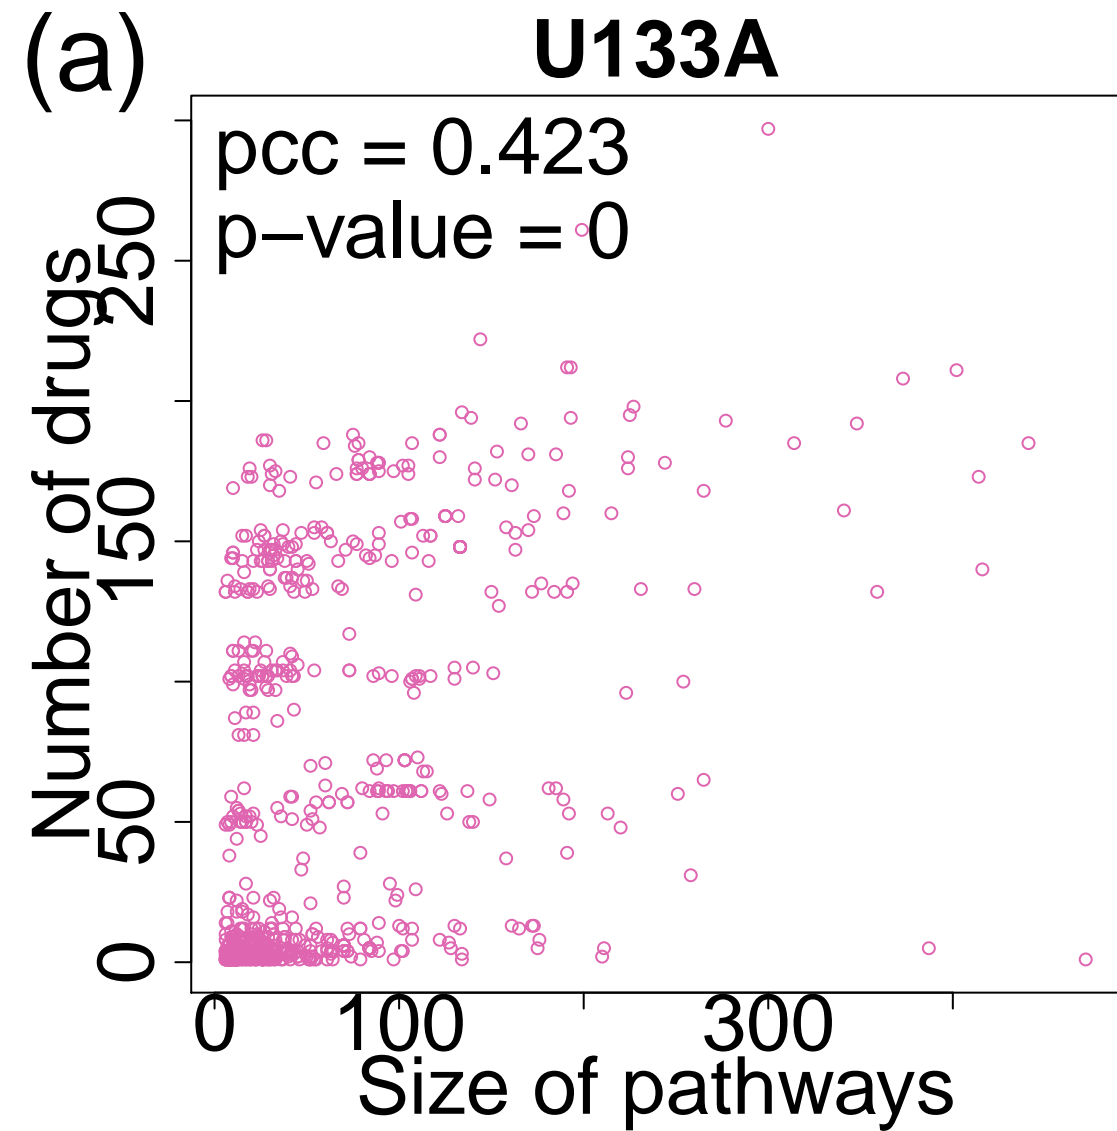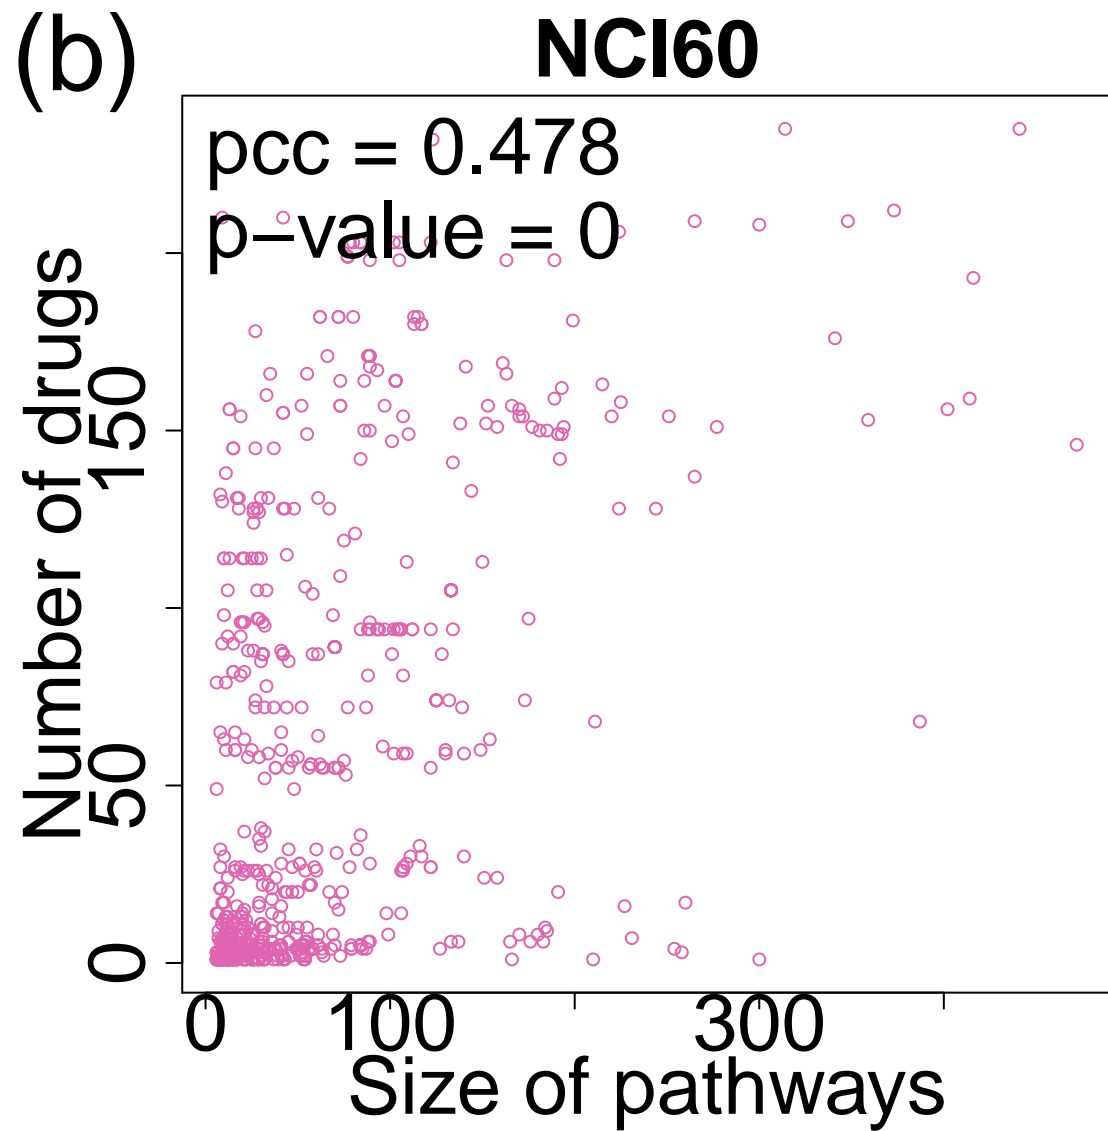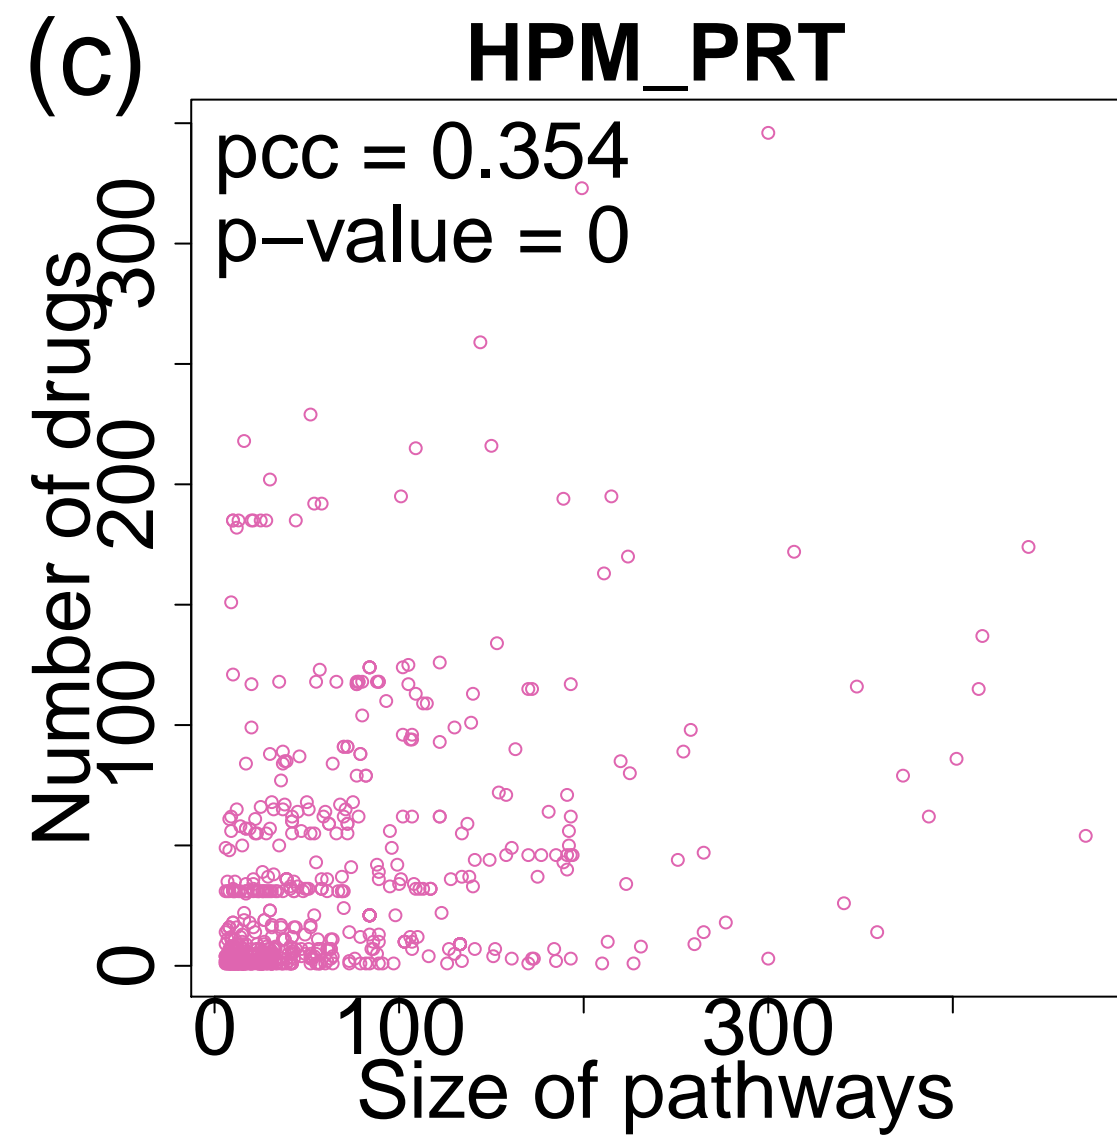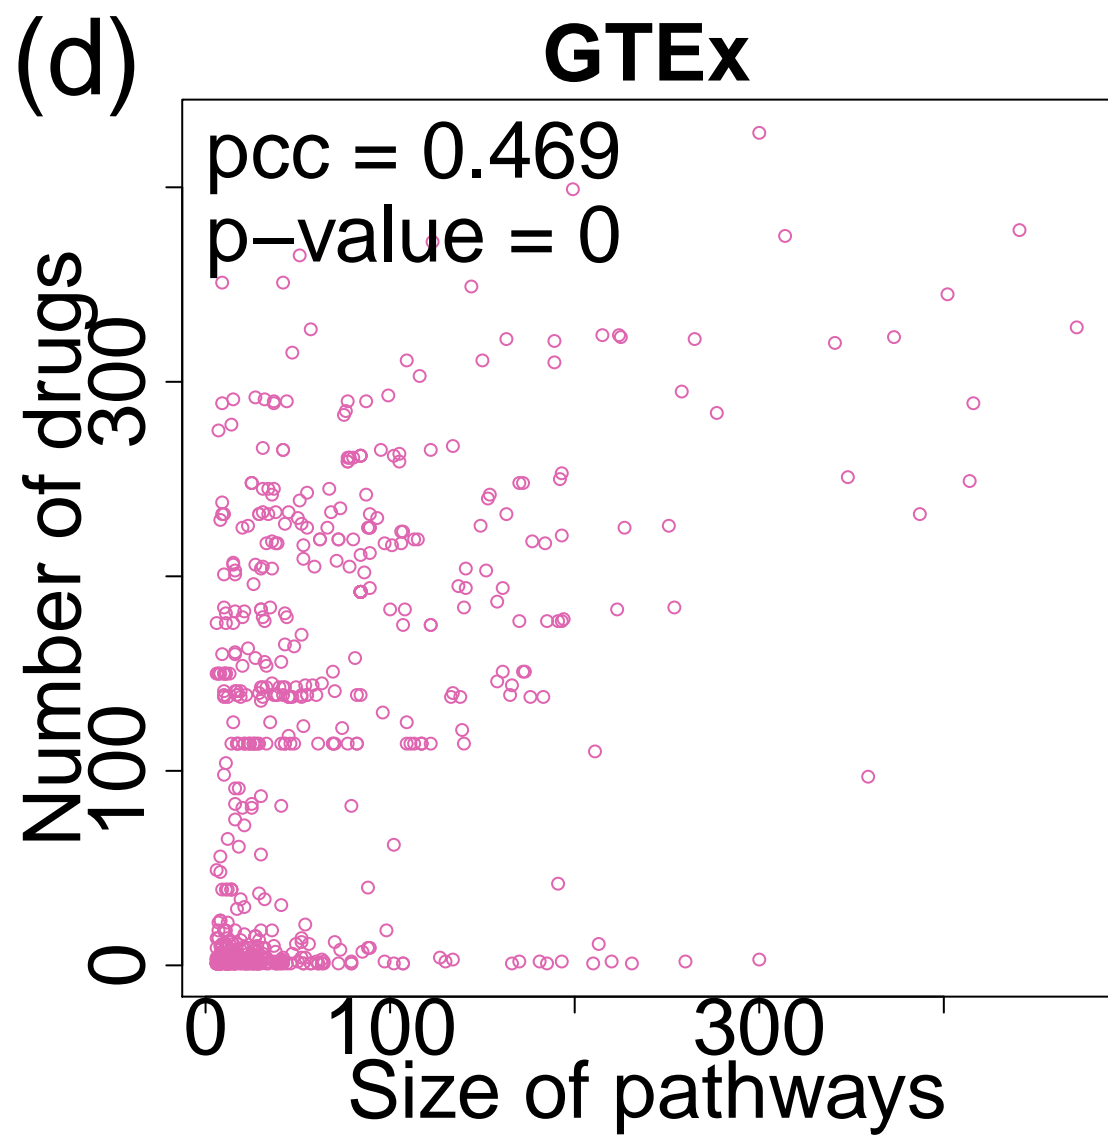

Supplement: PSP4-7-453-s005.pdf [file PSP4-7-453-s005.pdf]

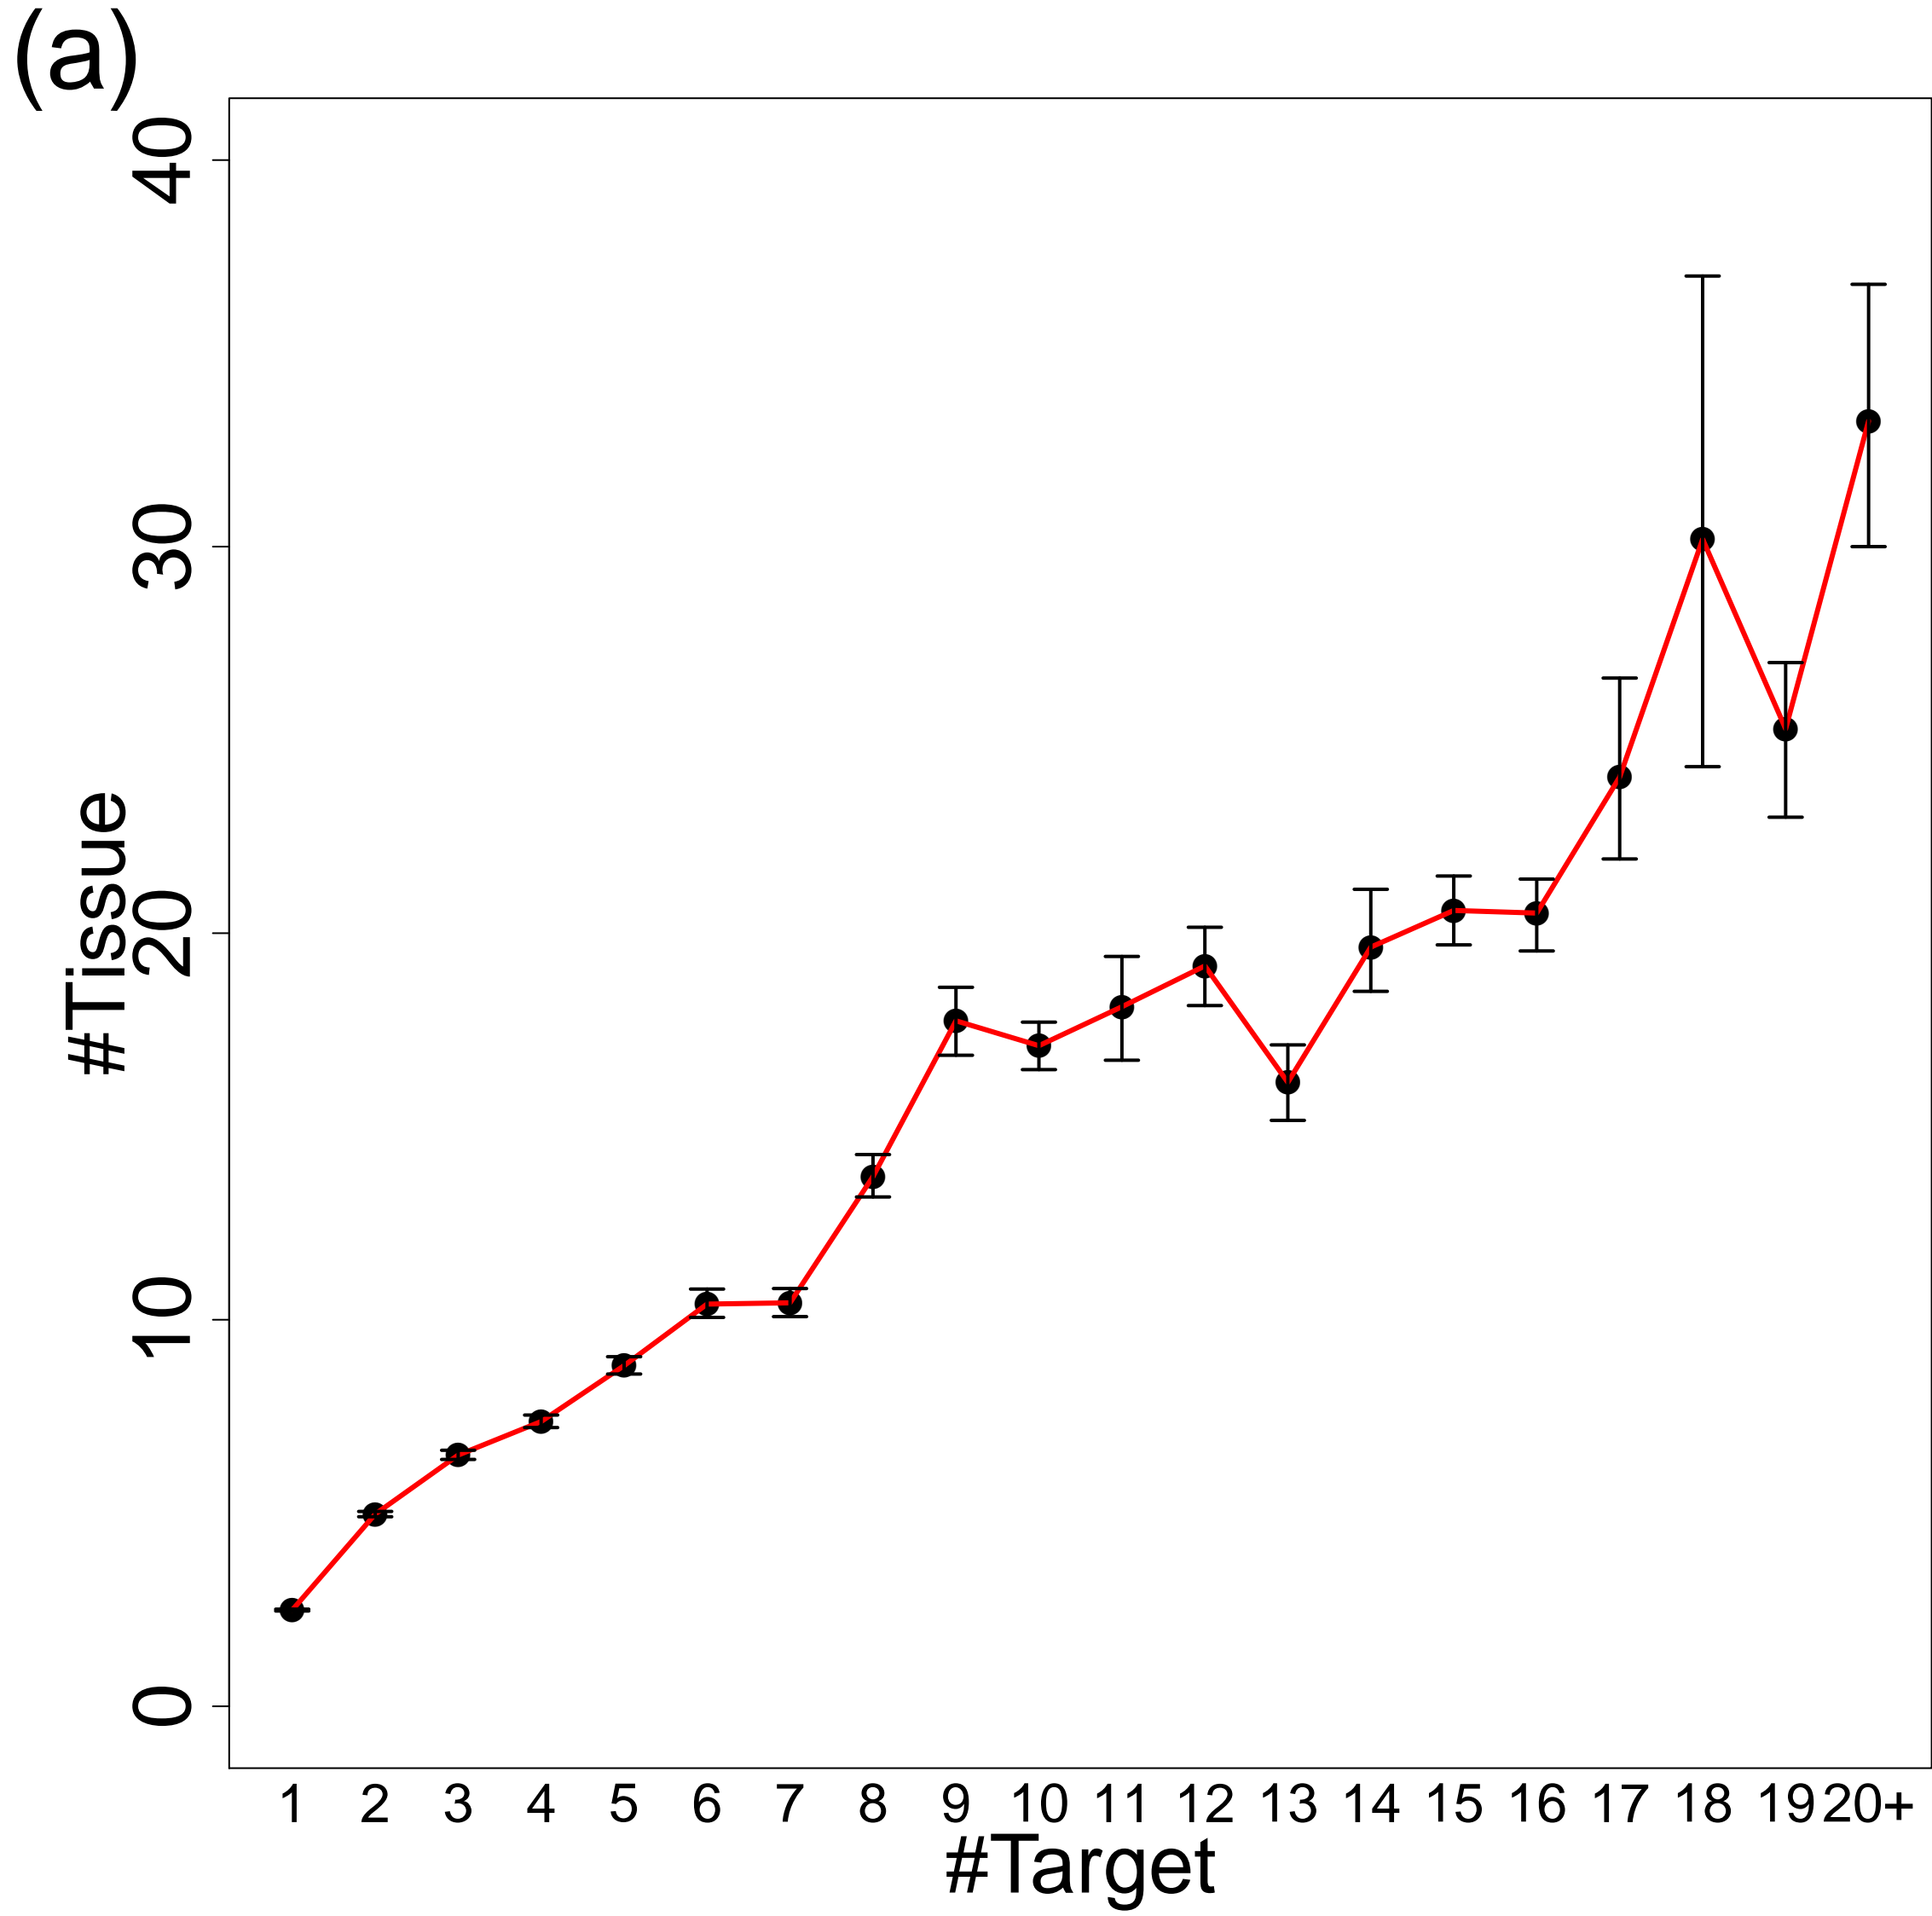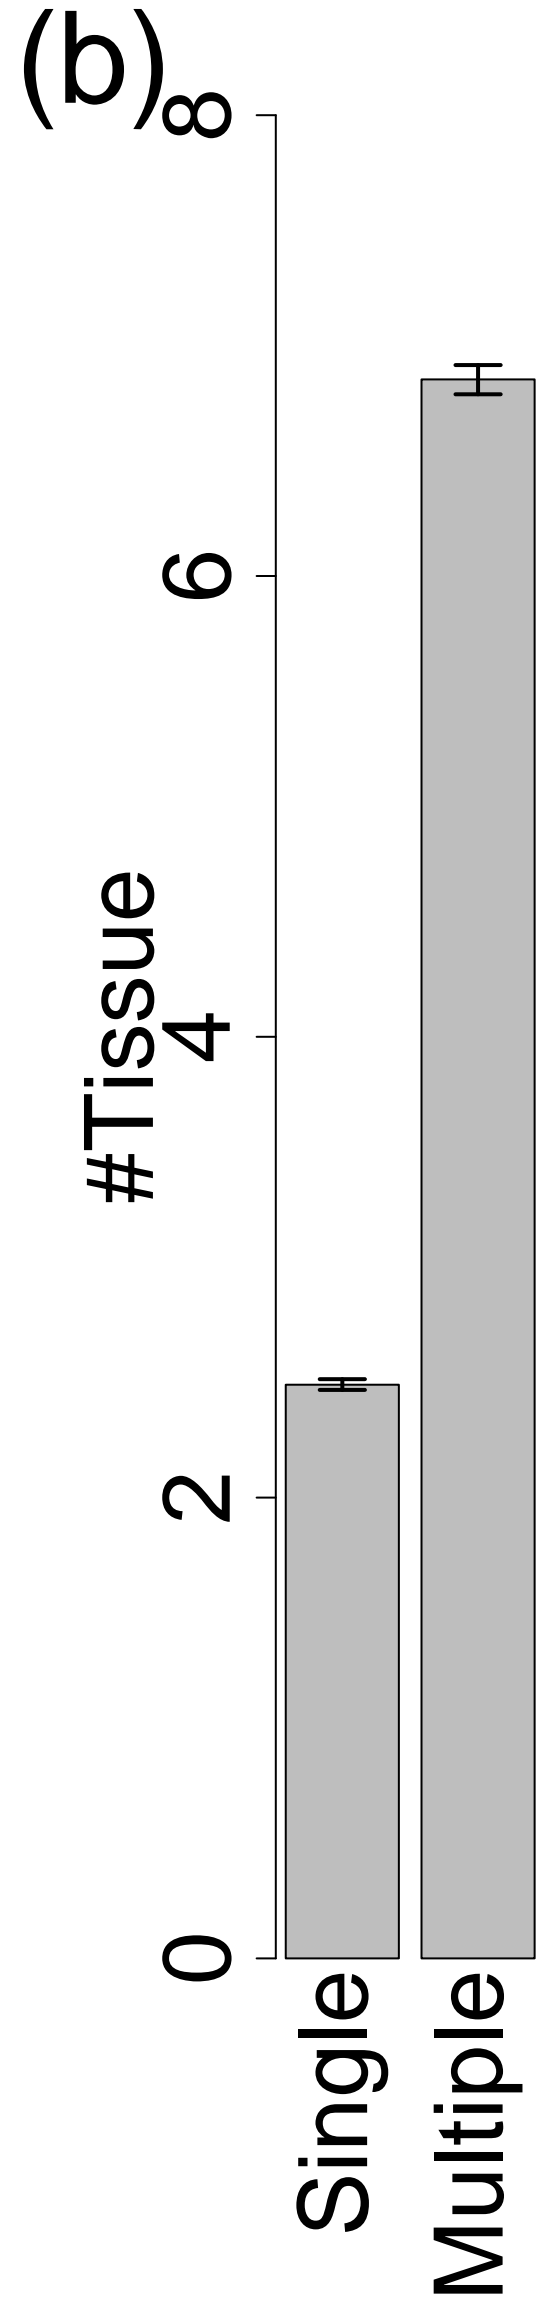

Supplement: PSP4-7-453-s006.pdf [file PSP4-7-453-s006.pdf]

**(a)**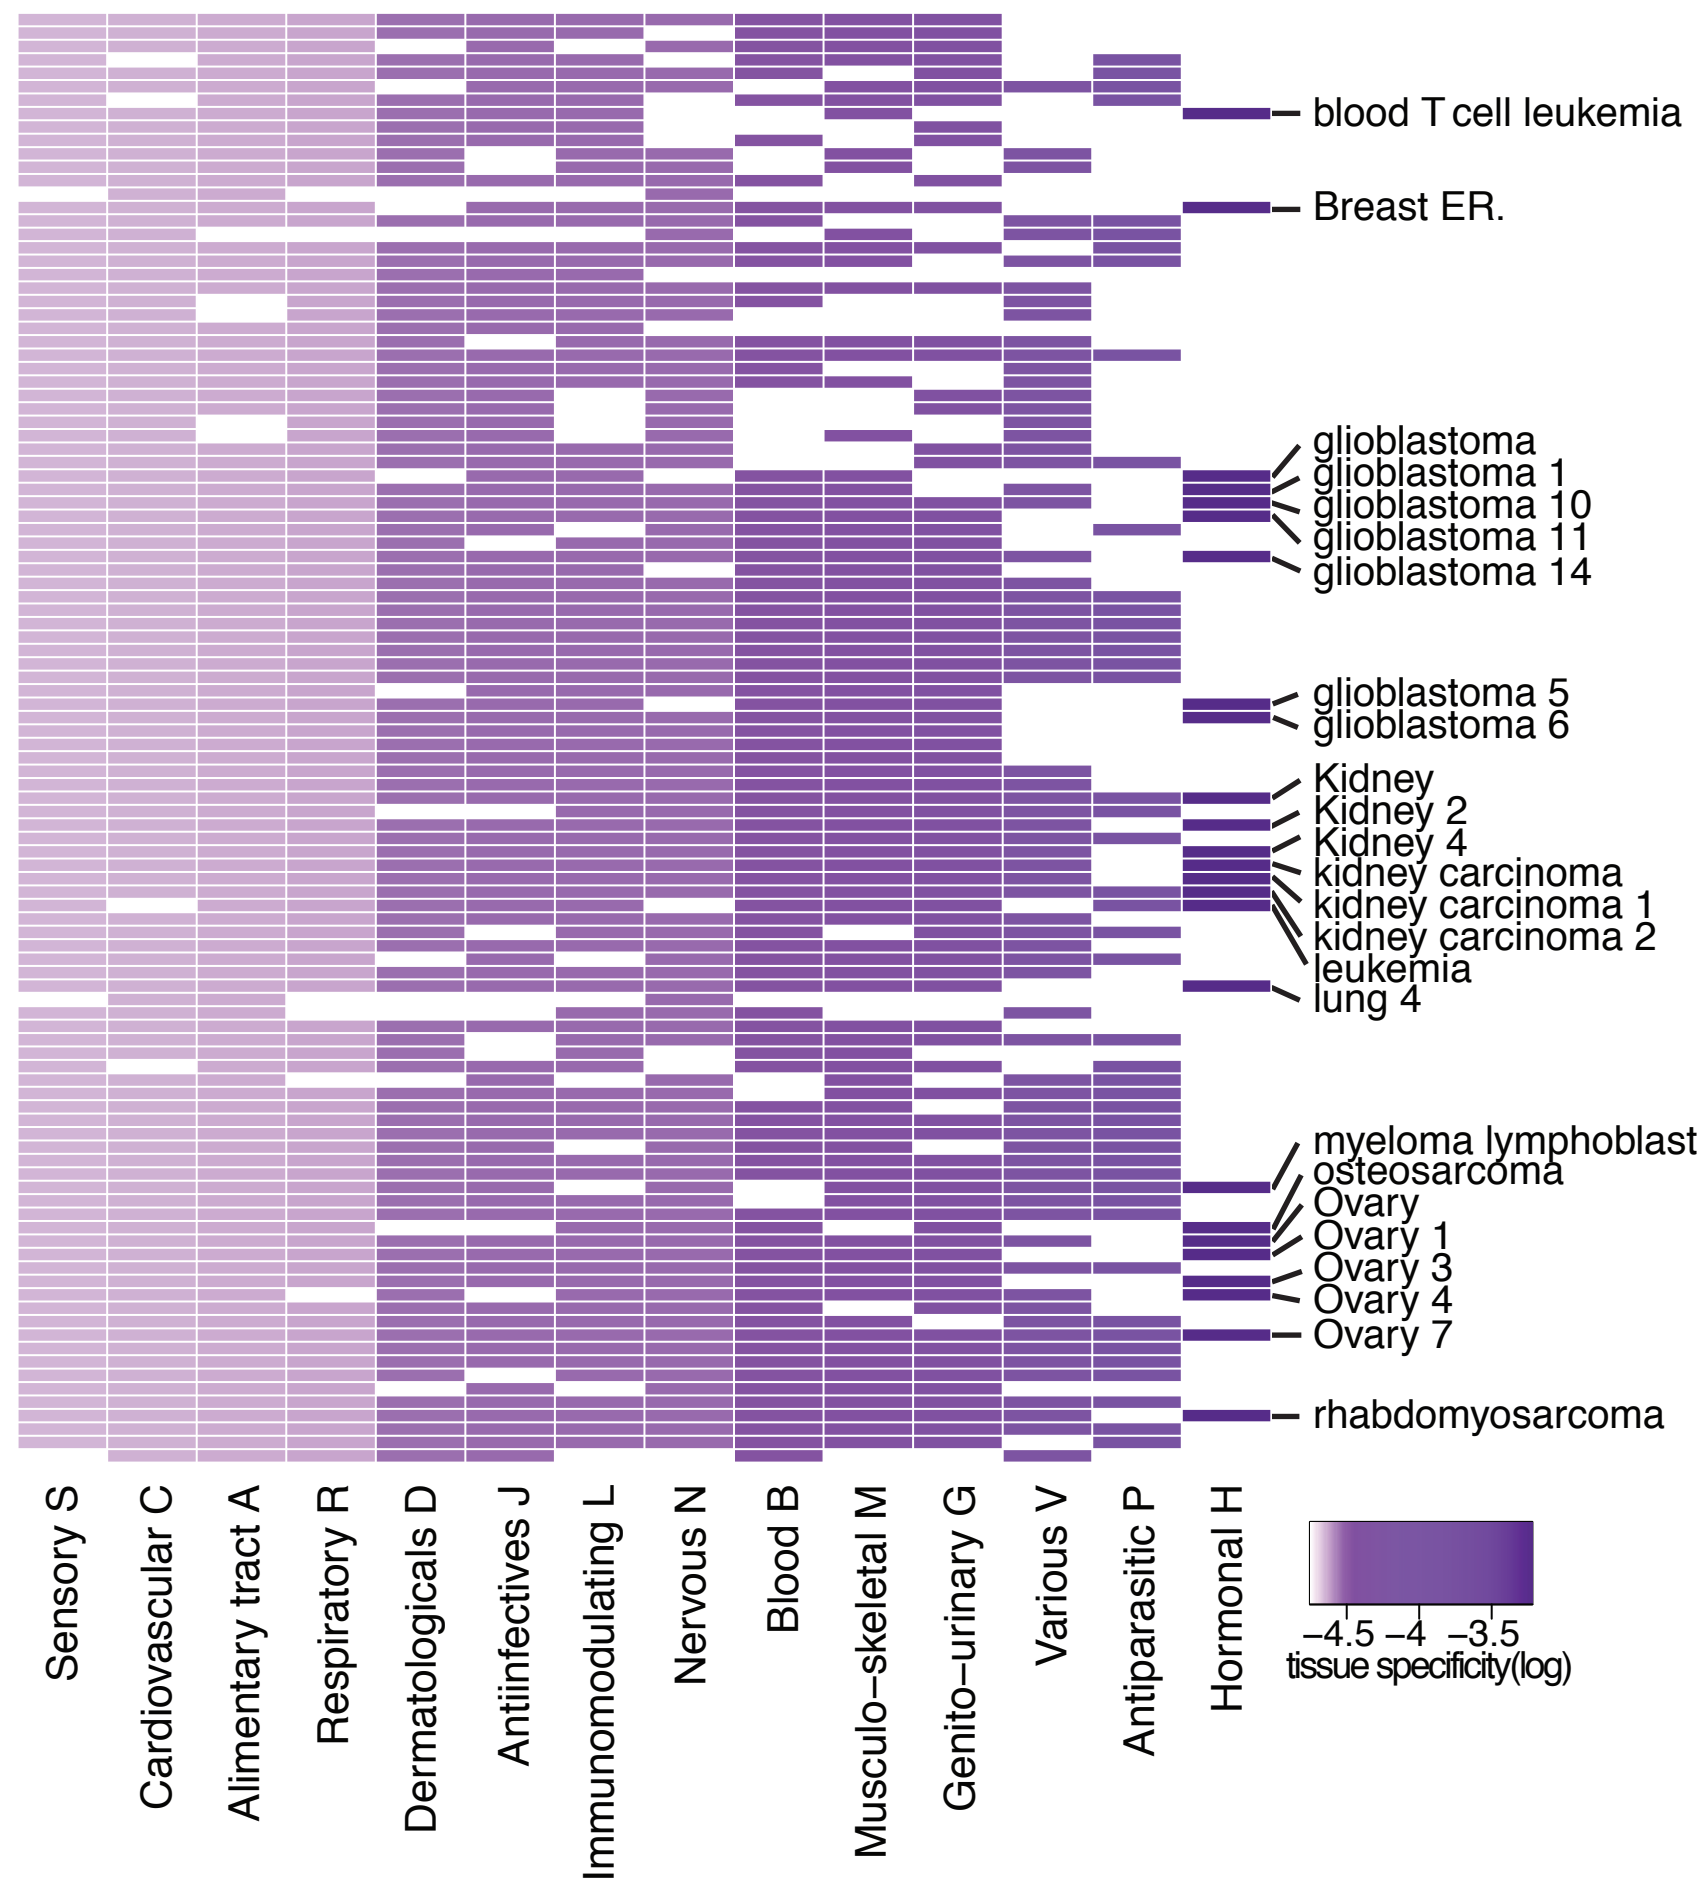**(b)**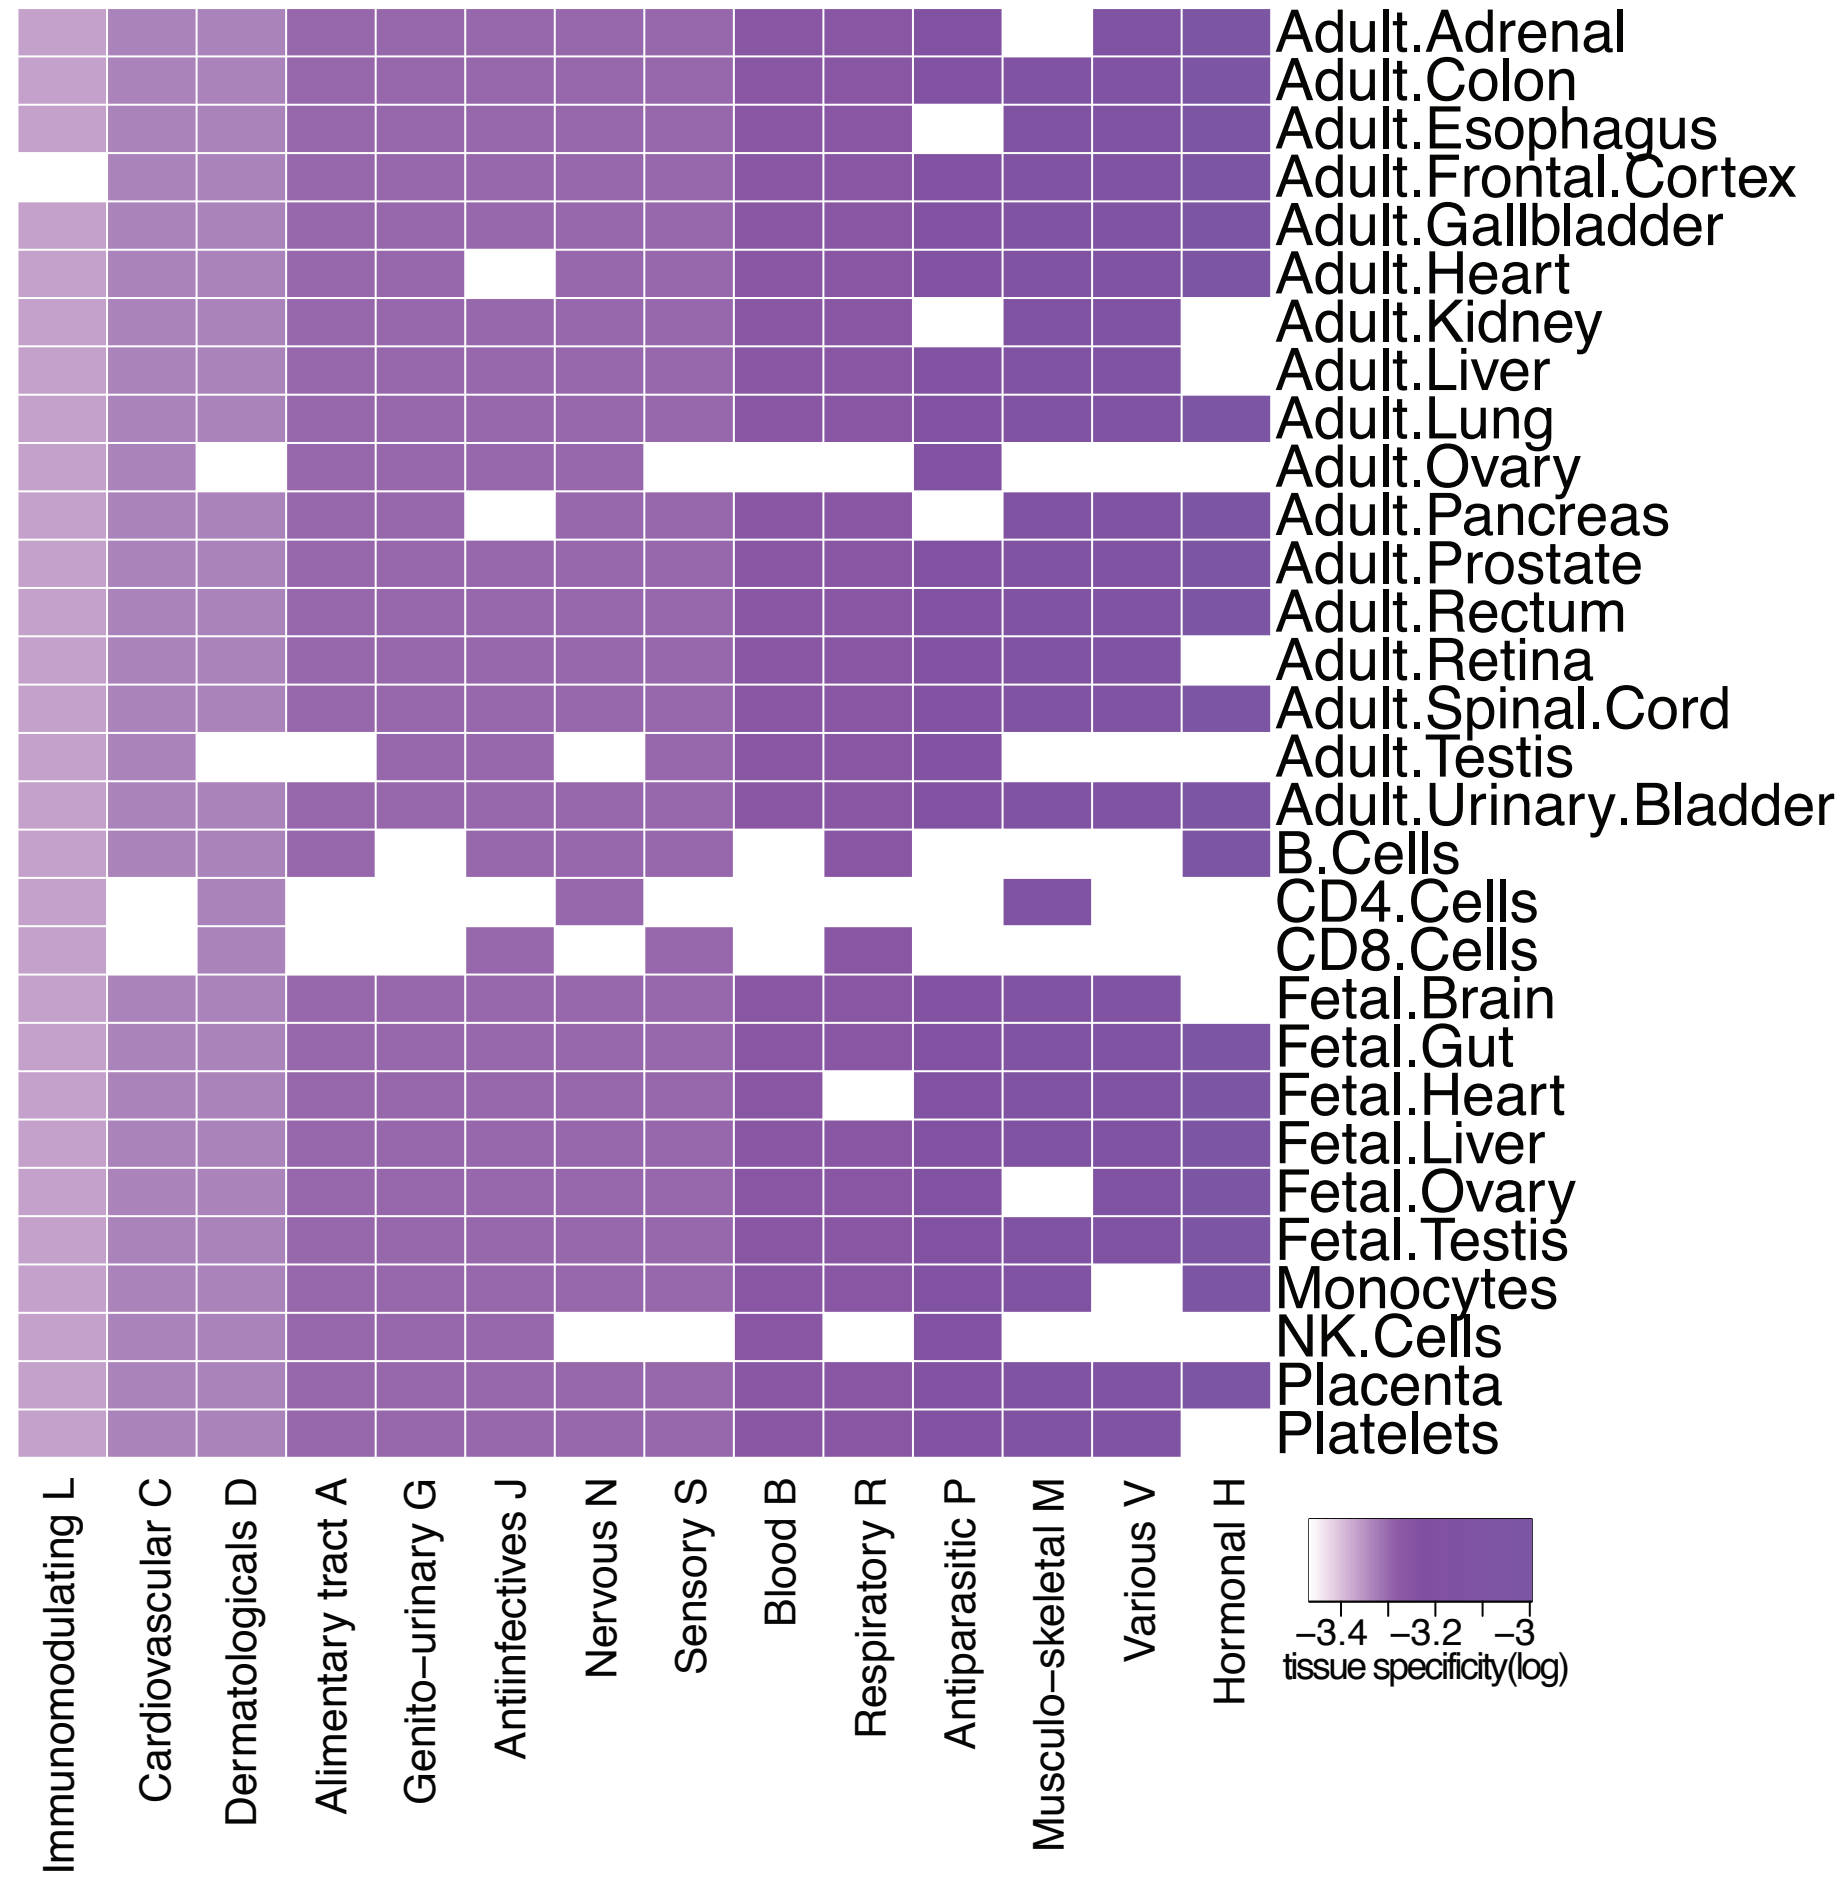**(c)**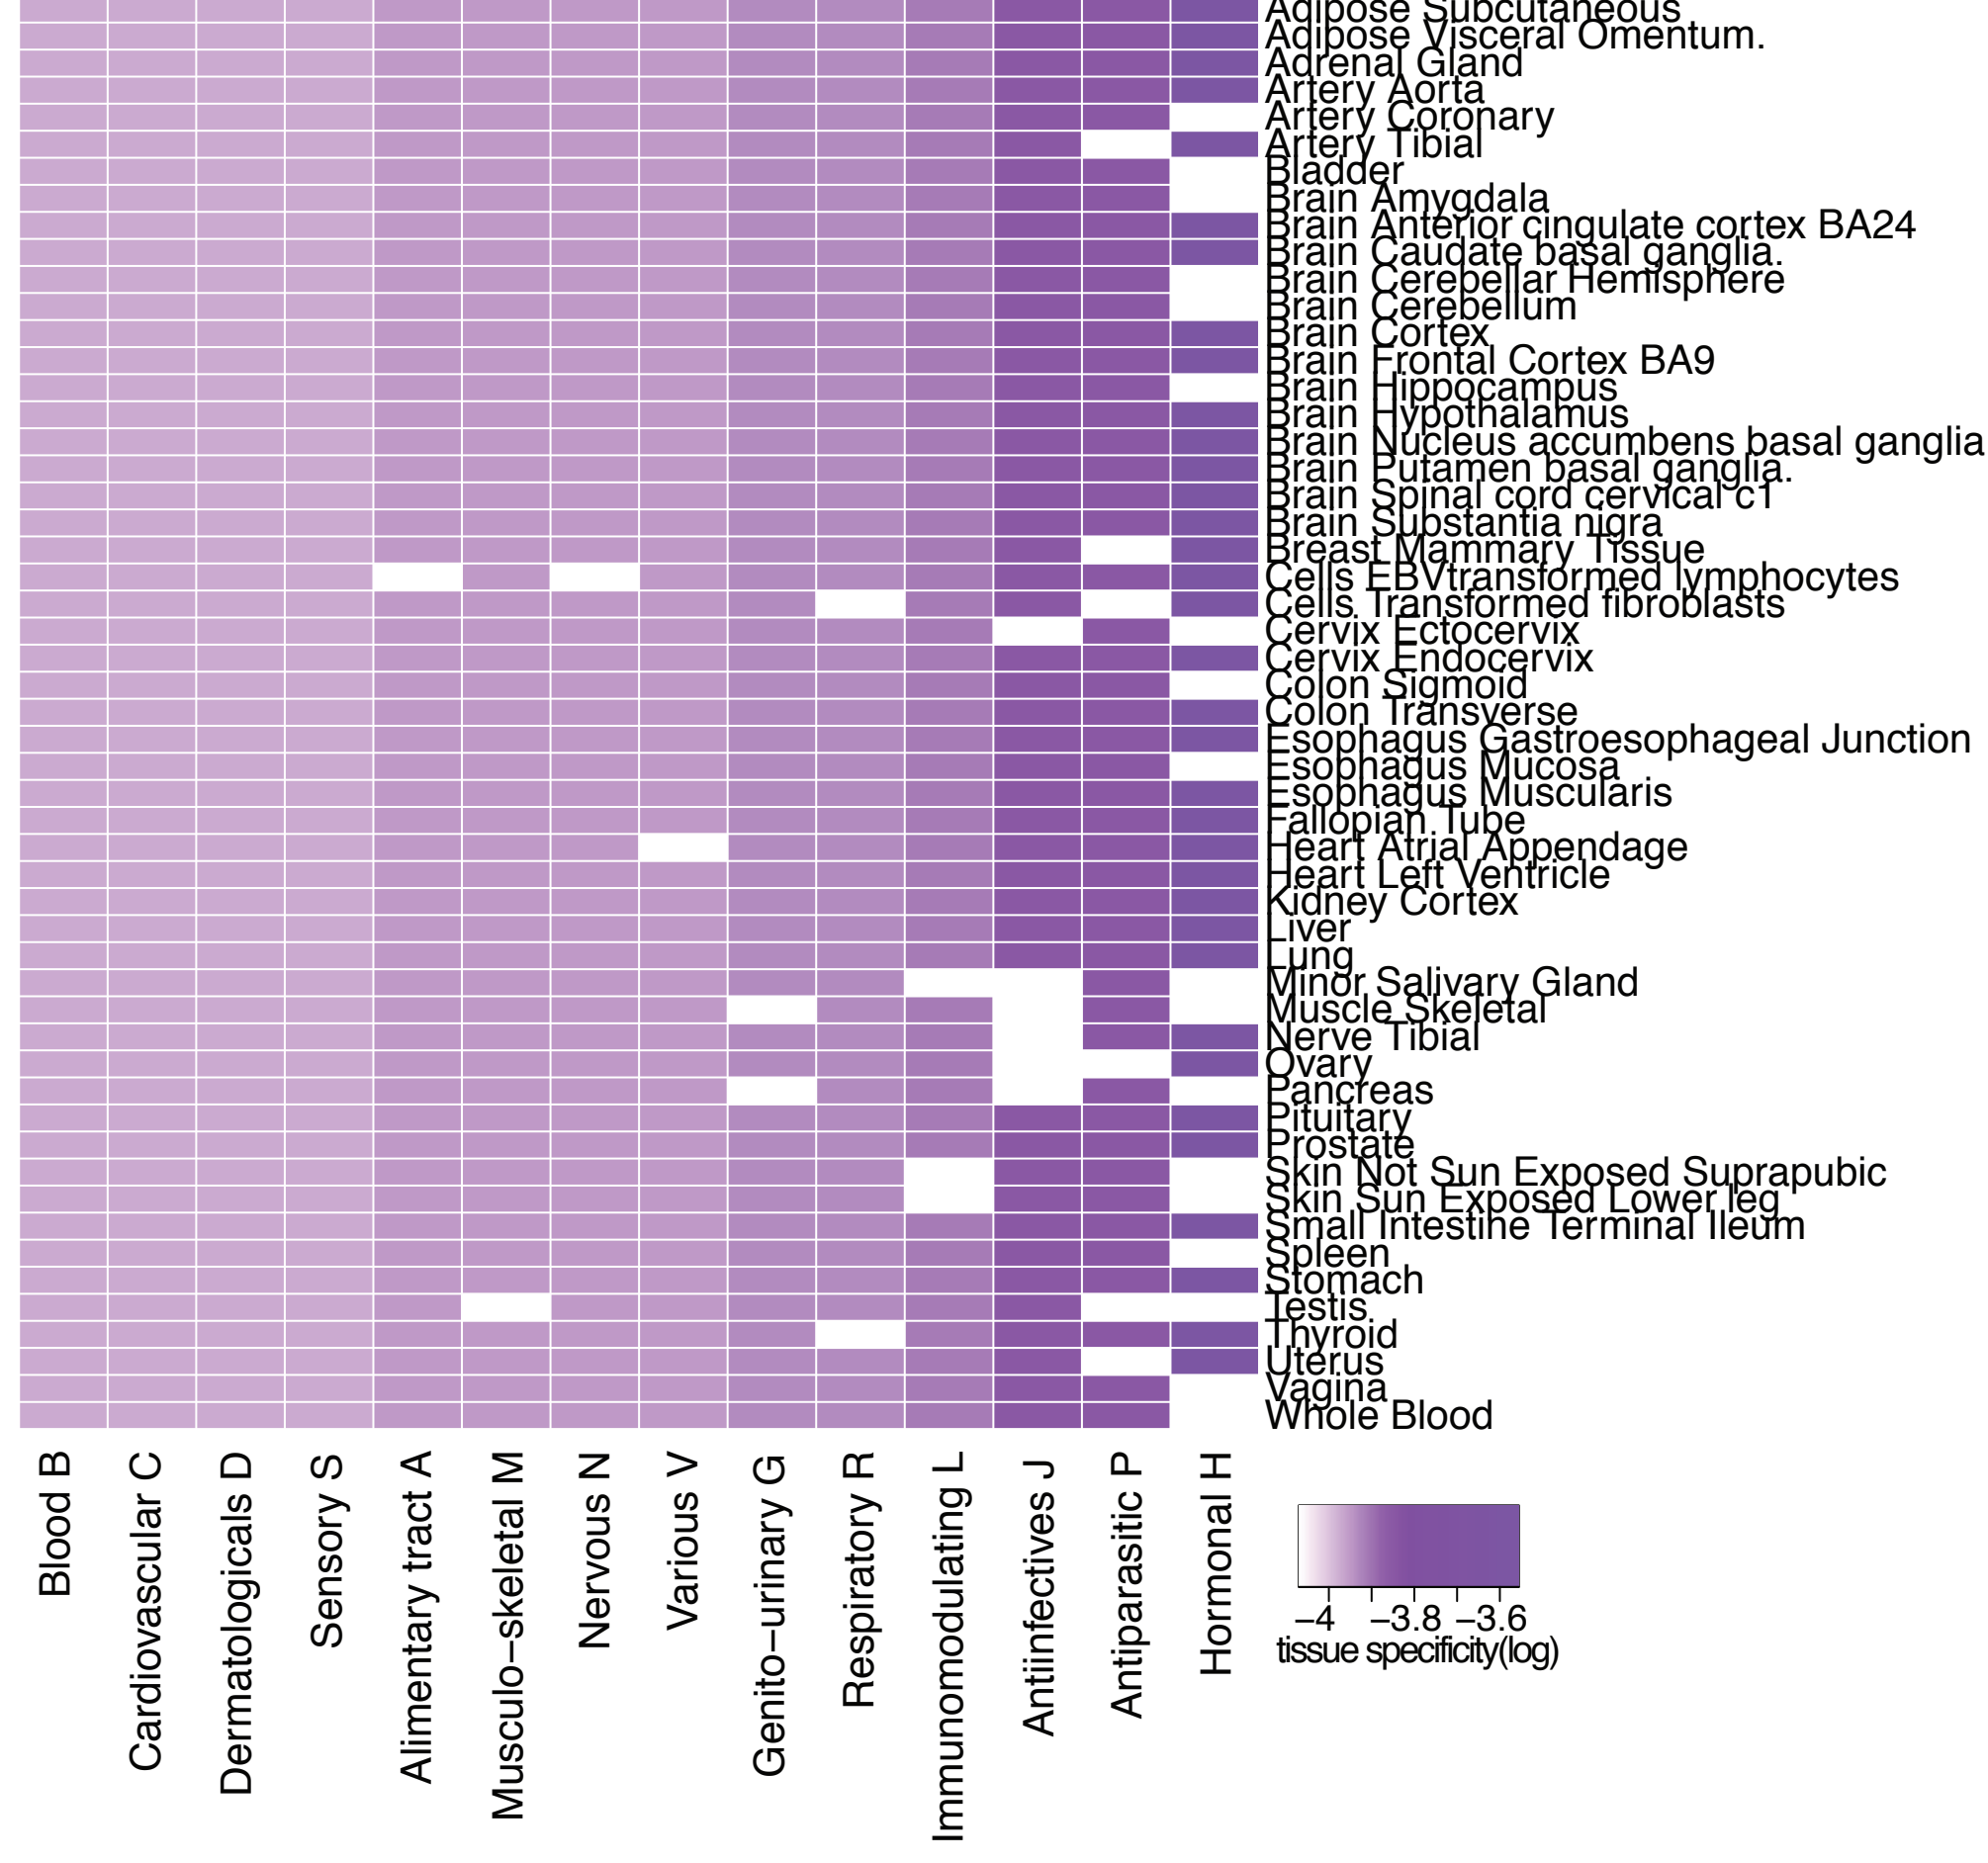

Supplement: PSP4-7-453-s007.pdf [file PSP4-7-453-s007.pdf]

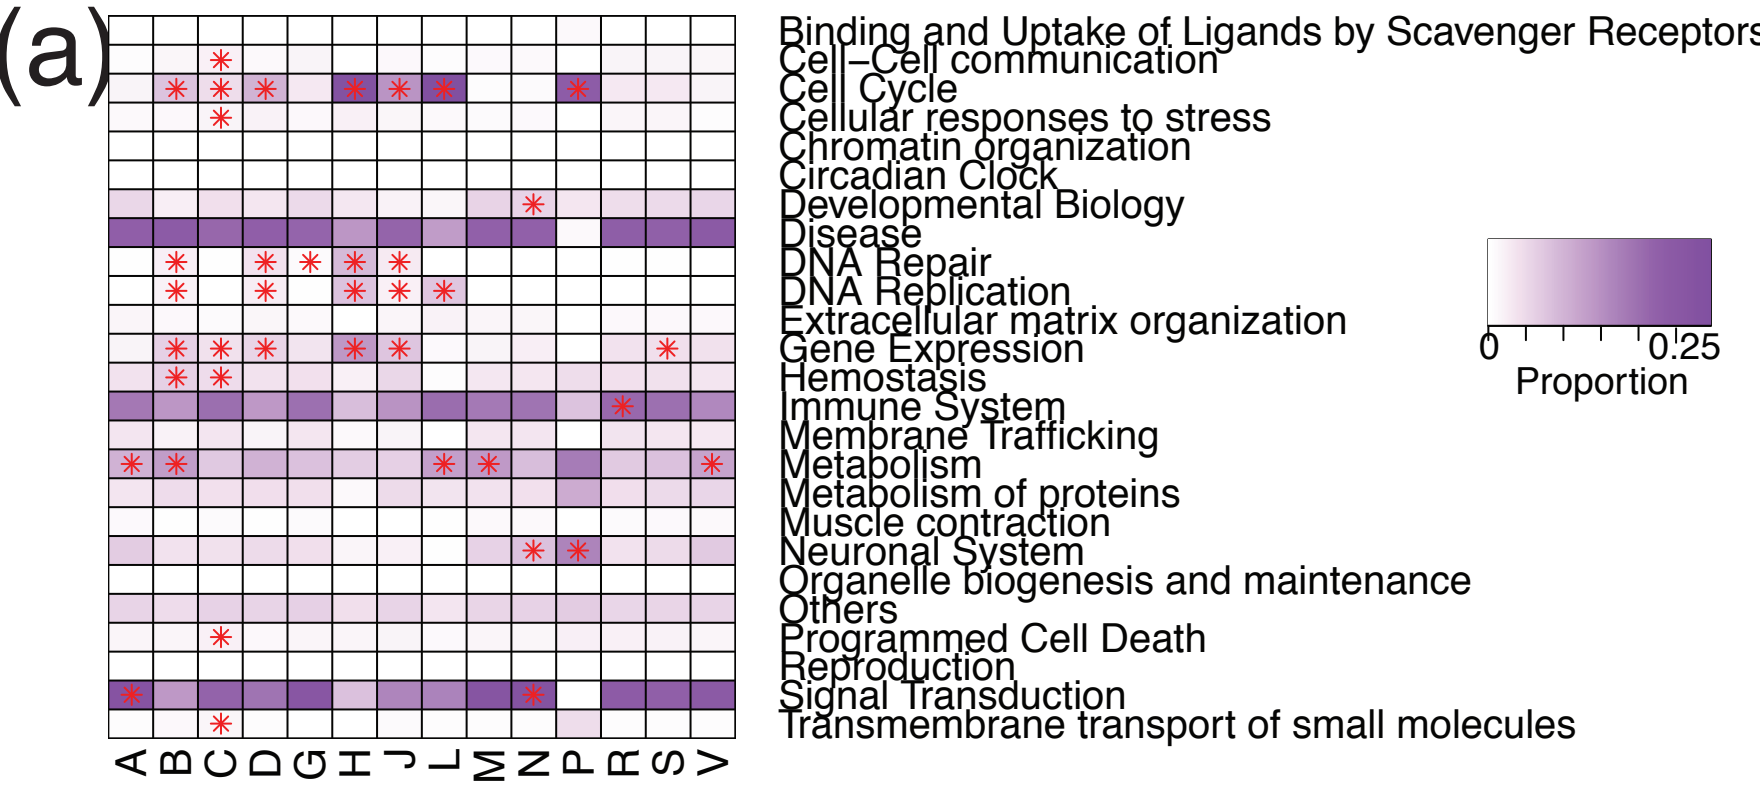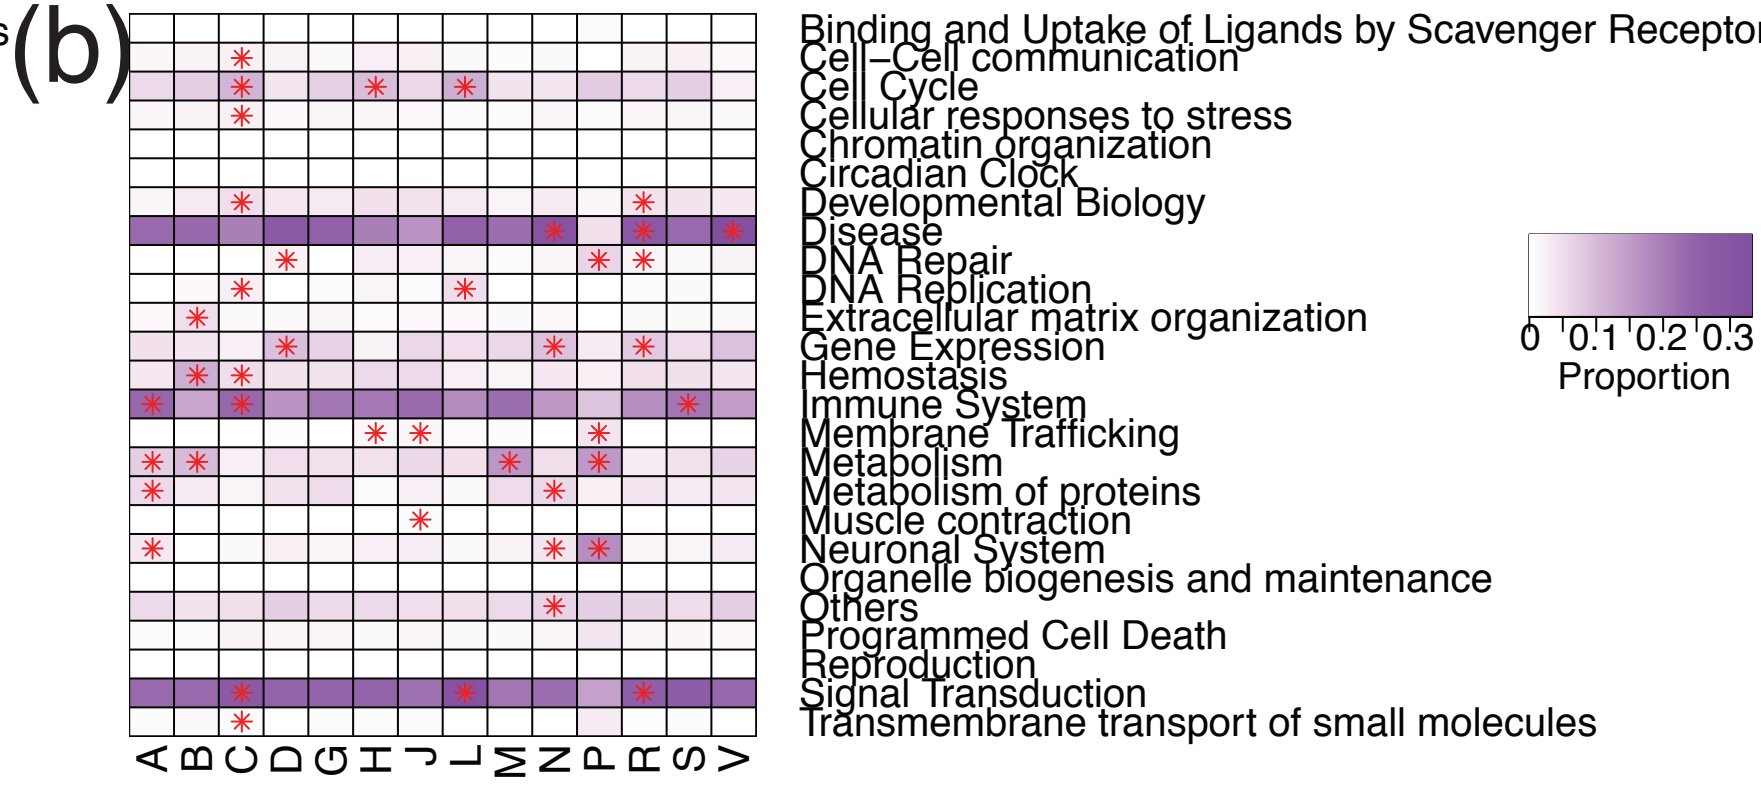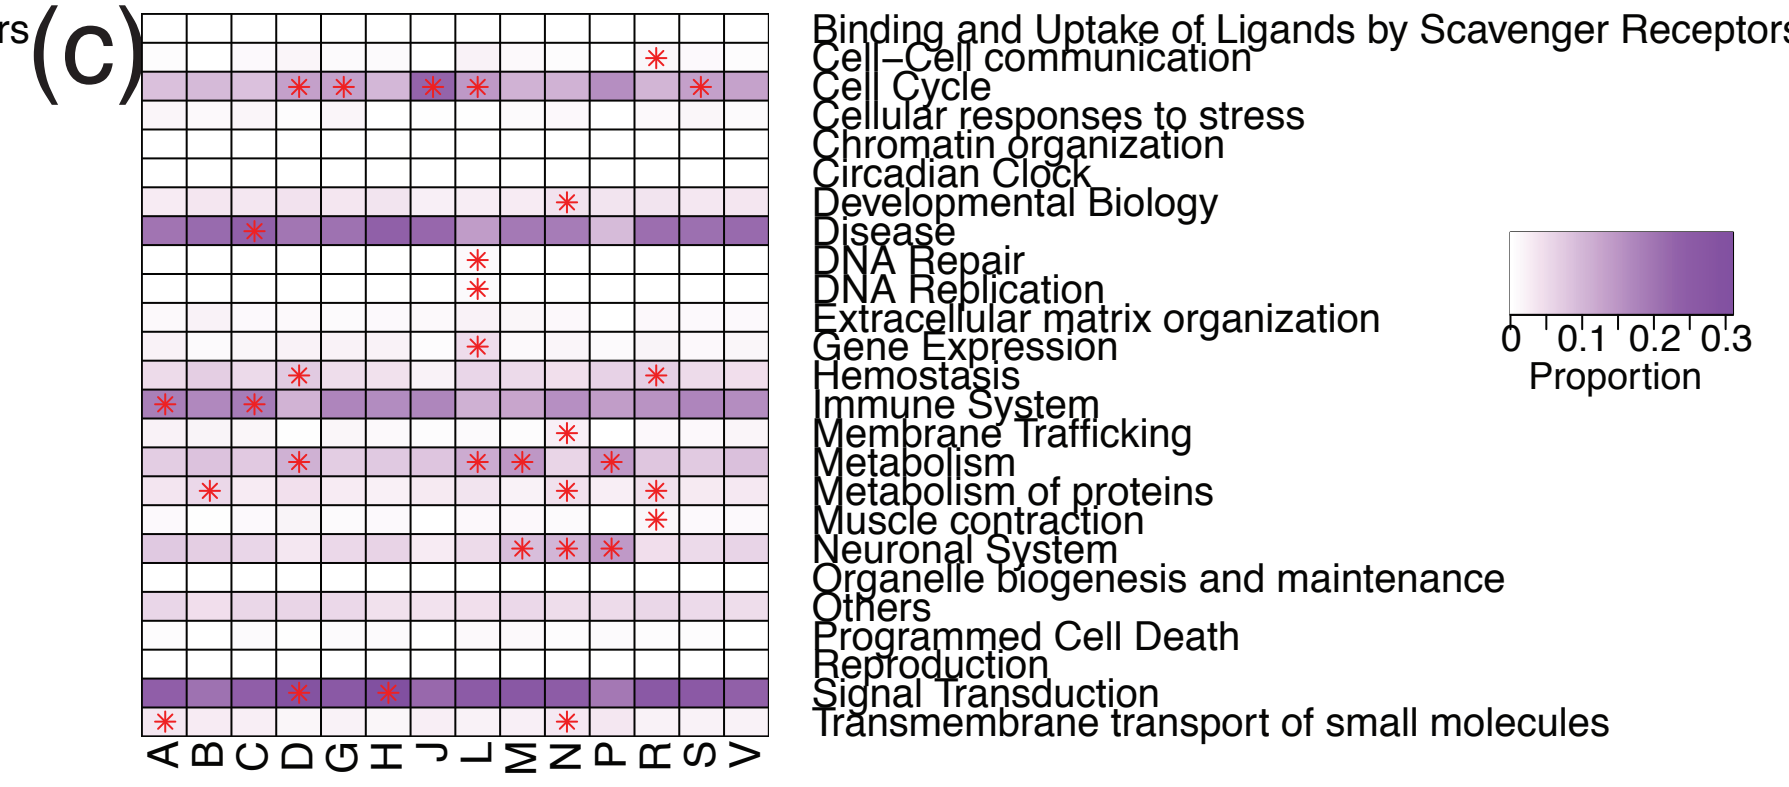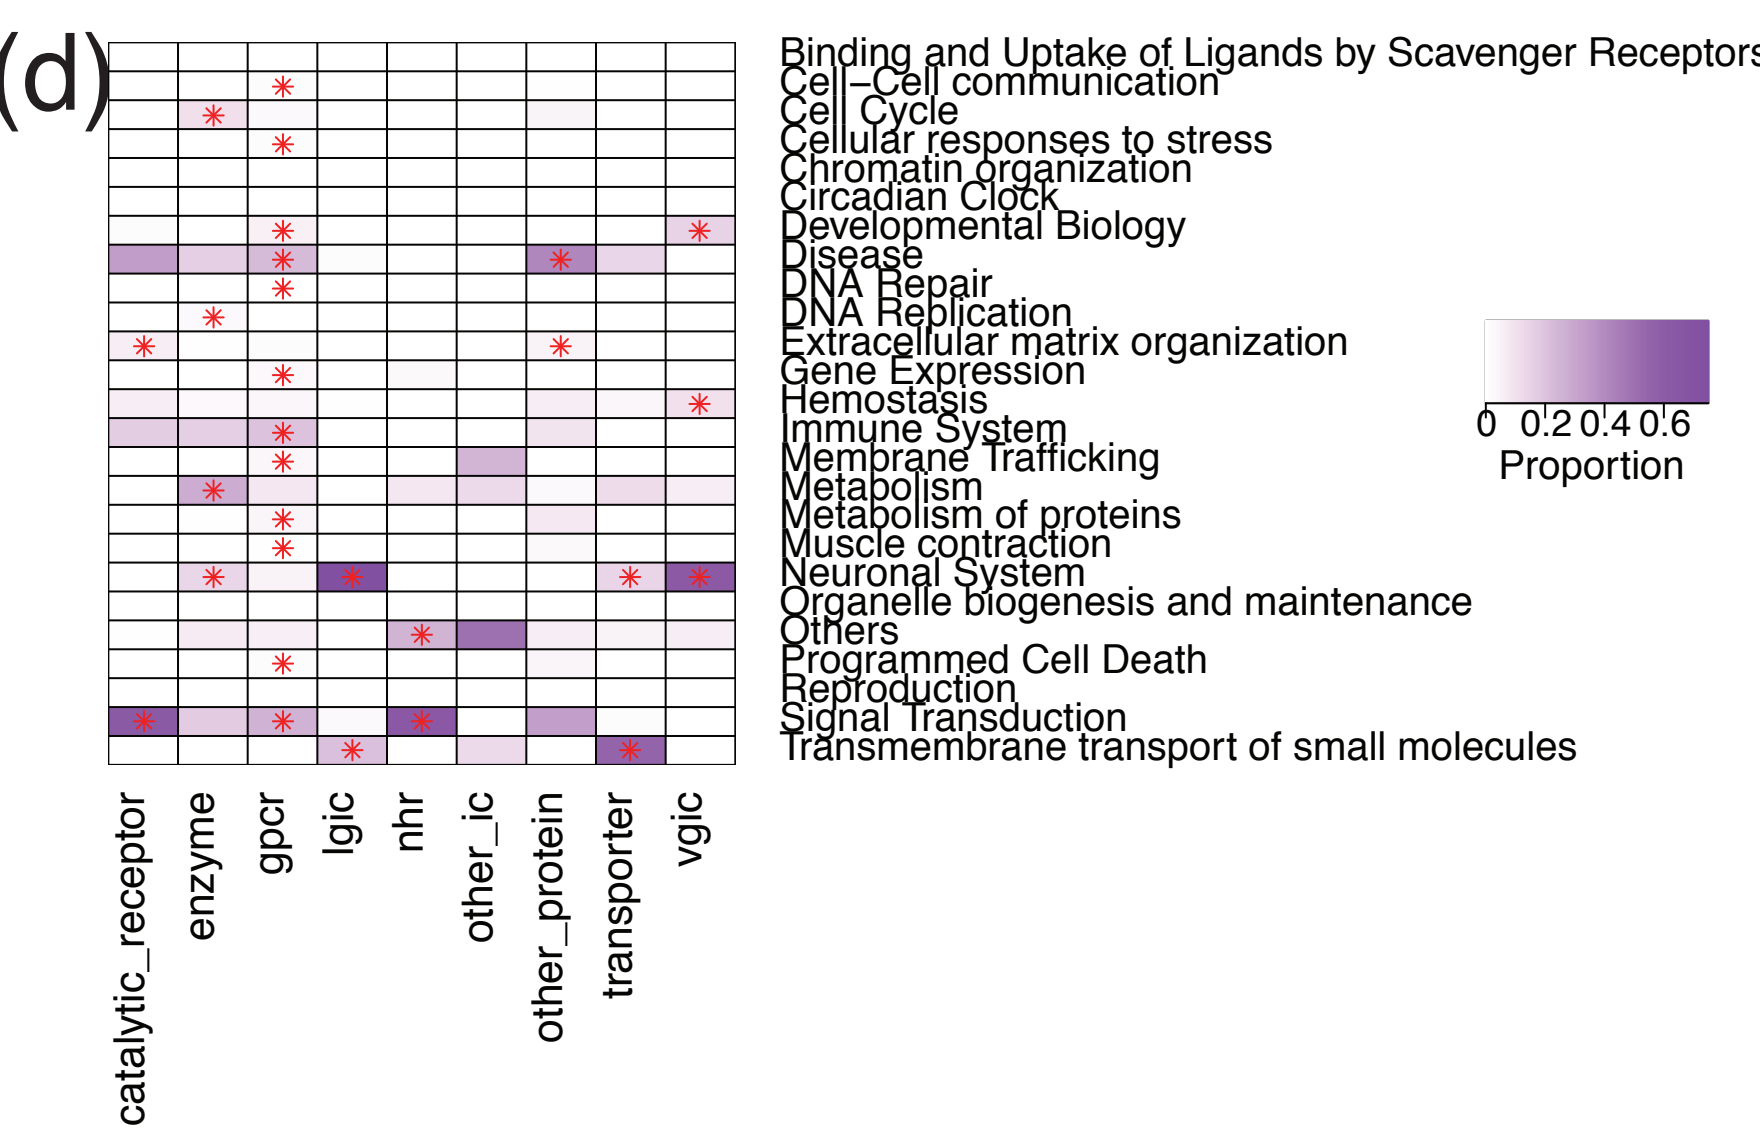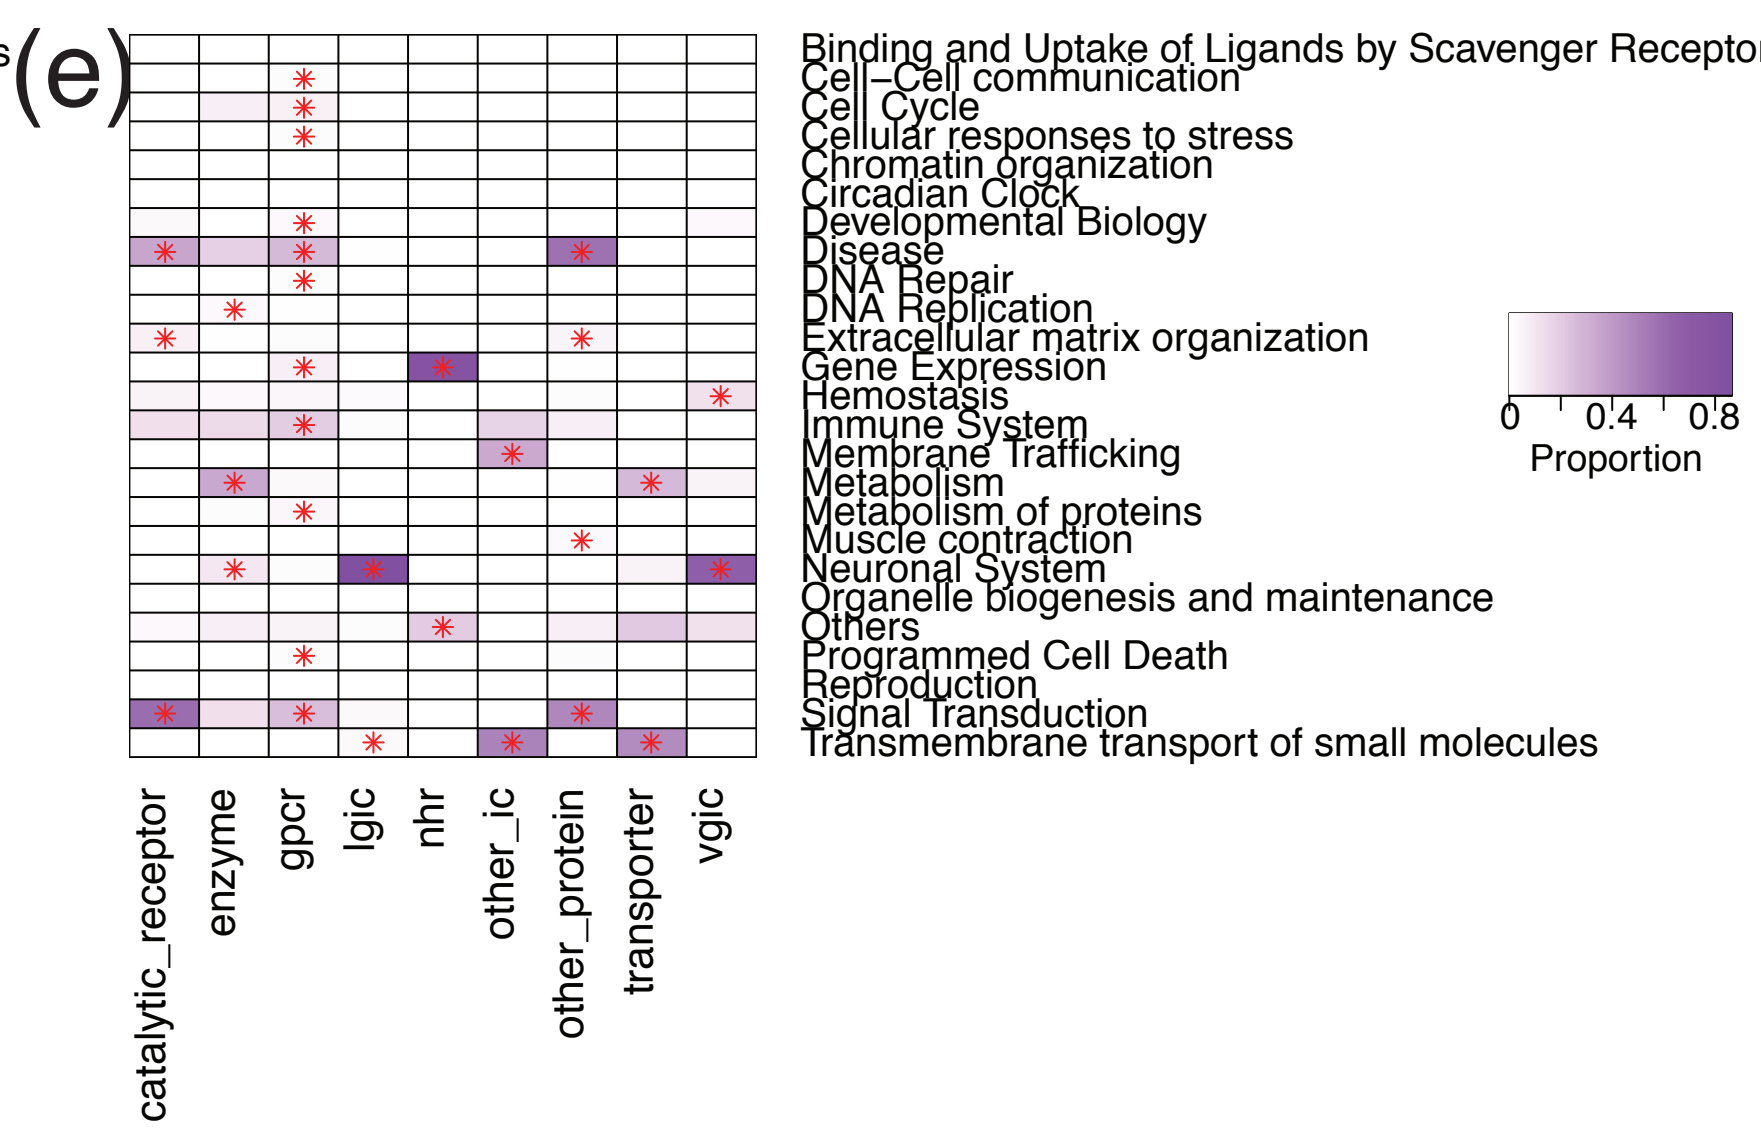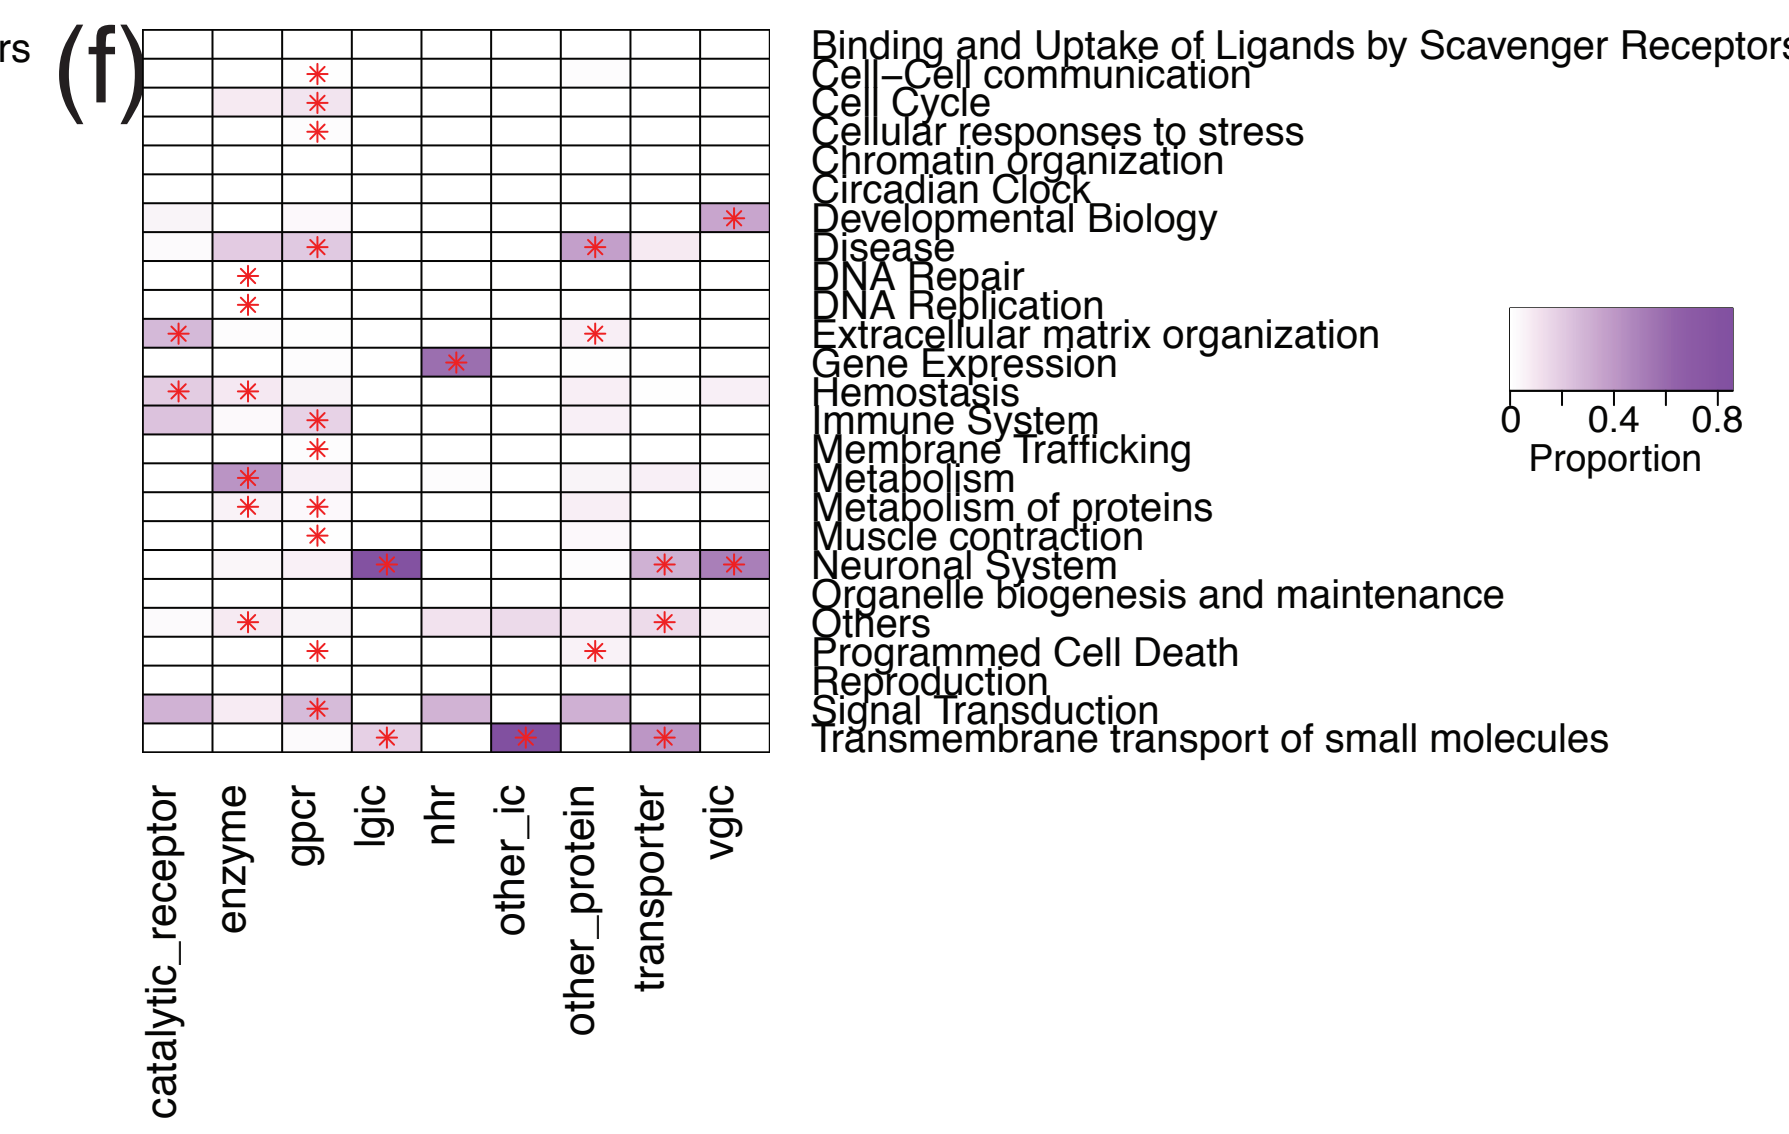

Supplement: PSP4-7-453-s008.pdf [file PSP4-7-453-s008.pdf]
